# Supplementary material for: Efficacy of a personalised pelvic floor muscle training programme on urinary incontinence after radical prostatectomy (MaTchUP): protocol for a randomised controlled trial
Source: PubMed Central journal article supplement — BMJ Open. 2019 May 5;9(5):e028288. doi: 10.1136/bmjopen-2018-028288 (PMC6502040; doi:10.1136/bmjopen-2018-028288), 2019-05-05
Supplement: bmjopen-2018-028288.draft_revisions.pdf [file bmjopen-2018-028288.draft_revisions.pdf]

# BMJ Open

BMJ Open is committed to open peer review. As part of this commitment we make the peer review history of every article we publish publicly available.

When an article is published we post the peer reviewers' comments and the authors' responses online. We also post the versions of the paper that were used during peer review. These are the versions that the peer review comments apply to.

The versions of the paper that follow are the versions that were submitted during the peer review process. They are not the versions of record or the final published versions. They should not be cited or distributed as the published version of this manuscript.

BMJ Open is an open access journal and the full, final, typeset and author-corrected version of record of the manuscript is available on our site with no access controls, subscription charges or pay-per-view fees (<http://bmjopen.bmj.com>).

If you have any questions on BMJ Open's open peer review process please email [info.bmjopen@bmj.com](mailto:info.bmjopen@bmj.com)

# BMJ Open

## Efficacy of a personalised pelvic floor Muscle Training program on Urinary incontinence after radical Prostatectomy (MaTchUP): Protocol for a randomised controlled trial

|                               |                                                                                                                                                                                                                                                                                                                                                                                                                                                                                                                                                                    |
|-------------------------------|--------------------------------------------------------------------------------------------------------------------------------------------------------------------------------------------------------------------------------------------------------------------------------------------------------------------------------------------------------------------------------------------------------------------------------------------------------------------------------------------------------------------------------------------------------------------|
| Journal:                      | <i>BMJ Open</i>                                                                                                                                                                                                                                                                                                                                                                                                                                                                                                                                                    |
| Manuscript ID                 | bmjopen-2018-028288                                                                                                                                                                                                                                                                                                                                                                                                                                                                                                                                                |
| Article Type:                 | Protocol                                                                                                                                                                                                                                                                                                                                                                                                                                                                                                                                                           |
| Date Submitted by the Author: | 30-Nov-2018                                                                                                                                                                                                                                                                                                                                                                                                                                                                                                                                                        |
| Complete List of Authors:     | Hodges, Paul; The University of Queensland, Stafford, Ryan; The University of Queensland Coughlin, Geoff; Royal Brisbane & Women's Hospital, Renal Medicine; Wesley Hospital<br>Kasza, Jessica; Monash University<br>Ashton-Miller, James; University of Michigan<br>Cameron, Anne; University of Michigan<br>Connelly, Luke ; University of Queensland, Centre for the Business and Economics of Health; University of Queensland, Poche Centre for Indigenous Health<br>Hall, Leanne; The University of Queensland, School of Health and Rehabilitation Sciences |
| Keywords:                     | Prostate disease < UROLOGY, REHABILITATION MEDICINE, Urinary incontinences < UROLOGY, Clinical trials < THERAPEUTICS, Ultrasound < RADIOLOGY & IMAGING                                                                                                                                                                                                                                                                                                                                                                                                             |
|                               |                                                                                                                                                                                                                                                                                                                                                                                                                                                                                                                                                                    |

SCHOLARONE™  
Manuscripts

1  
2  
3  
4  
5 Efficacy of a personalised pelvic floor Muscle Training program  
6  
7  
8  
9  
10 on Urinary incontinence after radical Prostatectomy  
11  
12  
13  
14 (MaTchUP): Protocol for a randomised controlled trial  
15  
16  
17  
18  
19

20 Paul W Hodges<sup>1</sup>, Ryan E Stafford<sup>1</sup>, Geoff Coughlin<sup>2</sup>, Jess Kasza<sup>3</sup>, James Ashton-Miller<sup>4</sup>,  
21  
22 Anne P. Cameron<sup>5</sup>, Luke Connelly<sup>6</sup>, Leanne Hall<sup>1</sup>  
23  
24  
25

26  
27 <sup>1</sup> School of Health and Rehabilitation Sciences, The University of Queensland, Brisbane,  
28  
29 Australia  
30  
31

32 <sup>2</sup> Wesley Urology Clinic, Brisbane, Australia  
33

34 <sup>3</sup> Department of Epidemiology and Preventative Medicine, Monash University, Melbourne,  
35  
36 Australia  
37  
38

39 <sup>4</sup> Department of Mechanical Engineering, University of Michigan, Ann Arbor, USA  
40

41 <sup>5</sup> Department of Urology, University of Michigan, Ann Arbor, USA  
42

43 <sup>6</sup> Centre for the Business and Economics of Health, The University of Queensland, Australia;  
44  
45 and Department of Sociology and Business Law, The University of Bologna, Italy.  
46  
47

48 **Corresponding author:** Paul W Hodges  
49  
50 School of Health and Rehabilitation Sciences,  
51  
52 The University of Queensland, Brisbane, QLD 4072 Australia  
53  
54 Tel: +61 404 854 589  
55  
56 e-mail: [p.hodges@uq.edu.au](mailto:p.hodges@uq.edu.au)  
57  
58  
59

60 **Word count:** 4130

1  
2  
3 **Keywords:** Radical prostatectomy, incontinence, prostate cancer, pelvic floor muscles,  
4  
5 rehabilitation  
6  
7

## 8 Abstract 9

10  
11 **Introduction:** Prostate cancer is the most common cancer in men. Prostatectomy is the most  
12  
13 common treatment. Morbidity from prostatectomy is high - 80% of men experience urinary  
14  
15 incontinence which negatively impacts quality-of-life. Post-surgical pelvic floor muscle  
16  
17 training is commonly prescribed but recent systematic reviews found no evidence of efficacy.  
18  
19 We propose a new treatment that commences pre-operatively and targets functional training  
20  
21 of specific pelvic floor muscles that contribute to urinary continence. Assessment and  
22  
23 biofeedback using transperineal ultrasound imaging assists training. This will be compared  
24  
25 against conventional training (maximal pelvic floor muscle contraction assessed by digital  
26  
27 rectal examination), and no training. Embedded physiological studies will allow the  
28  
29 investigation of moderation and mediation of the treatment effect on the outcomes.  
30  
31  
32  
33

34 **Methods and analysis:** This randomised clinical trial will include 363 men scheduled to  
35  
36 undergo radical prostatectomy for prostate cancer. Participants will be randomised into  
37  
38 *Urethral training*, *Conventional training*, and *No training* groups. Clinical data will be  
39  
40 collected at baseline (1-2 weeks pre-surgery), and post-surgery after catheter removal, weekly  
41  
42 to 3 months (primary endpoint), and monthly to 12 months. Outcomes include 24-hour pad  
43  
44 weight test (primary), incontinence, quality-of-life and cost effectiveness data.  
45  
46

47  
48 Neuromuscular control measures of pelvic floor muscles will be measured at baseline, post-  
49  
50 surgery, 6 weeks, 3 and 12 months. Study assessors and statistician will be blinded to the  
51  
52 group allocation.  
53

54  
55 **Ethics and dissemination:** This study is registered with the Australian New Zealand Clinical  
56  
57 Trials Registry and has ethical approval from university and host hospital Ethics Committees.  
58  
59  
60

1  
2  
3 Trial outcomes will be shared via national/international conference presentations and peer-  
4  
5 reviewed journal publications.  
6

7  
8 Trial registration number: ACTRN12617000788370 (registered 30<sup>th</sup> May 2017)  
9

## 10 Article Summary

### 11 12 13 14 Strengths and limitations of the study

- 15  
16 • Uses randomised design in a clearly defined population
- 17  
18 • Tests an innovative intervention designed to target mechanisms of urinary continence  
19  
20 in men that is based on recent physiological data of mechanisms of continence and  
21  
22 incontinence in men
- 23  
24 • Uses individualised care based on assessment using new transperineal ultrasound  
25  
26 imaging methods to study pelvic floor muscle function
- 27  
28 • Includes investigation of mediation and moderation of the treatment effect by pelvic  
29  
30 floor muscle neuromuscular control variables  
31  
32  
33  
34  
35  
36  
37  
38  
39  
40  
41  
42  
43  
44  
45  
46  
47  
48  
49  
50  
51  
52  
53  
54  
55  
56  
57  
58  
59  
60

## Introduction

Prostate cancer is the most common non-cutaneous cancer in men in Australia and internationally (1 in 7 men) and the second most common cause of cancer death<sup>1</sup>. Radical prostatectomy (prostate removal to prevent metastasis) is a common treatment. The good news is that prostate cancer has very high 5-yr survival - 95%<sup>1</sup>. The bad news is that morbidity is high – almost 80% of men experience incontinence after prostatectomy (post-prostatectomy incontinence: PPI)<sup>2</sup>, and many are incontinent beyond 12 months<sup>2</sup>. PPI has been identified as the major determinant of quality of life for these men, and many live for many years with ongoing major cost (up to 33% use incontinence products<sup>3</sup>) and social isolation<sup>4,5</sup>. Introduction of robotic prostatectomy has not reduced PPI<sup>6</sup>. Effective methods to reduce PPI are a priority.

Pelvic floor muscle training (PFMT) to enhance muscular control of urinary continence after prostatectomy is logical. Although efficacy of PFMT in female stress urinary incontinence has class 1 evidence<sup>7</sup>, early optimistic outcomes for PPI<sup>8</sup> are superseded by systematic review evidence of no efficacy in males<sup>9</sup>. Recent physiological research using innovative ultrasound imaging<sup>10,11</sup> and electromyography methods<sup>12</sup> suggests that conventional PFMT programs, which involves repeated maximal contractions assessed by digital rectal examination, and commenced after surgery<sup>13</sup>; fail to consider the mechanisms of incontinence after prostatectomy; are unlikely to target the muscles that control urinary continence; do not target the aspects of function that need to be trained; and start too late.

Urinary continence in men depends on contributions from smooth muscle of the urethra and urethral constriction generated by contraction of three striated muscles: the striated urethral sphincter (SUS); puborectalis/pubovisceralis (PR); and bulbocavernosus (BC)<sup>10</sup>. These striated muscles maintain gentle activation during urine storage<sup>12,14</sup> with additional activation when continence is challenged by elevated intra-abdominal pressure

1  
2  
3 such as coughing<sup>15</sup> or postural tasks<sup>14</sup>. Radical prostatectomy inherently removes the prostatic  
4 segment of the urethra, and its smooth muscle (called the internal sphincter), and may  
5 remove/damage the SUS muscle<sup>16</sup> or its innervation<sup>17</sup>. Surgery may also affect the smooth  
6 muscle of the bladder neck<sup>17</sup>, as well as bladder contractility<sup>18</sup> and compliance<sup>16</sup>, contributing  
7 to overactivity of the detrusor muscle<sup>16 18</sup>. Recovery of continence after prostatectomy is  
8 likely to require: enhanced function of SUS (and other striated muscles) to compensate for  
9 the reduced smooth muscle; compensation by the PR and BC if SUS is affected by surgery;  
10 and training of the bladder to hold volume. Recent work has highlighted that persistent PPI is  
11 associate with impaired shortening of the SUS and BC, and descent rather than elevation of  
12 the bladder neck (explained by failure of PR to prevent depression from excessive abdominal  
13 pressure) during voluntary activation, but this varies between men<sup>10</sup>.

24 Supported by this physiological evidence and pilot clinical data, we predict that by  
25 implementation of a PFMT program that targets the muscles that control urethral pressure  
26 (particularly SUS) and compensates for tissues removed during surgery, in a manner that  
27 matches the individual needs of each man, and trains incorporation of pelvic floor muscle  
28 activation into functional tasks, we can achieve superior outcomes with substantial impact on  
29 quality of life after prostatectomy.

## 30 Aim

31 In this trial we aim to:

- 32 1. Determine whether PFMT that involves individualised functional training of  
33 neuromuscular (NM) control of striated muscles that constrict the urethra (*Urethral*  
34 *training*) achieves more rapid continence recovery after radical prostatectomy than a  
35 PFMT program that involves brief strong contractions of muscles around the anus that  
36 are not specific for urinary continence (*Conventional training*) or *No training*.

- 2.
3. Test whether the quality of NM control of striated muscles that constrict the urethra at baseline (prior to surgery) moderates the relative efficacy of *Urethral training* compared to *Conventional training* or *No training*.
4. Determine whether change in NM control of striated muscles that constrict the urethra mediates the recovery of urinary continence.
5. Compare the cost effectiveness of the training programs.

## Methods and analysis

### Study design

This manuscript describes a research protocol for the “personalised pelvic floor Muscle Training for Urinary incontinence after Prostatectomy” (MaTchUP) randomised controlled trial. This study is a prospectively registered, randomised controlled trial. Participants will be randomised into either *Urethral training*, *Conventional training* or *No training*. This protocol has been developed in accordance with SPIRIT (Standard Protocol Items: Recommendations for Interventional Trials)<sup>19</sup>.

### Participant recruitment

Men scheduled to undergo radical prostatectomy (open or robotic) for prostate cancer at the Wesley and Princess Alexandra Hospitals (Brisbane, Queensland) will be invited to participate via an information pamphlet provided by administrative staff during a pre-surgical consultation with their treating urologist.

### Participants

To be eligible, participants must meet the following criteria:

#### Inclusion criteria:

- Scheduled to undergo radical prostatectomy for prostate cancer,



- 30–70 years of age,
- Able to attend assessment/rehabilitation sessions in Brisbane,
- Able to understand English.

#### Exclusion criteria:

- Urinary incontinence prior to surgery,
- Previous prostate surgery,
- Assessment/training of the pelvic floor muscles in the preceding 6 months,
- Scheduled to undergo or had previously undergone radiation therapy for prostate cancer.

#### Study Treatments

Volunteers will be screened via an on-line form and phone interview and then scheduled to undergo a baseline assessment in the laboratory 1-2 weeks prior to surgery.

After baseline assessment, participants will be randomised into one of three groups:

*Conventional training, Urethral training or No training.*

Randomisation will be in permuted blocks of size 4-8, stratified by surgeon and baseline NM control of striated muscles that constrict the urethra with patients dichotomised as good [or poor] by ability to achieve both  $\geq 4.1$  mm of SUS displacement and  $\geq 2.4$  mm of PR displacement as assessed with transperineal ultrasound imaging (see below; Stafford et al., 2018 unpublished data). Group allocation will be determined using an automatic randomisation schedule developed by an independent statistician and integrated into the REDCap data administration system (see below) to ensure concealed allocation.

Participants randomly allocated to the groups receiving treatment will attend up to 10 treatment sessions supervised by a physiotherapist. All participants will attend an initial session 1-2 weeks before surgery (after the baseline assessment). At this session, participants in the *No training* group will undergo no assessment or training and will not attend further

1  
2  
3 sessions. Participants allocated to one of the two treatment groups will be assessed by the  
4  
5 physiotherapist at the pre-operative session according to their allocated exercise program and  
6  
7 taught the initial training exercise to commence prior to surgery. After surgery, participants in  
8  
9 the exercise groups will attend up to 9 sessions, 1 week apart, commencing after catheter  
10  
11 removal (~2 weeks post-surgery) and continued until continence is achieved (using the  
12  
13 definition below) or until 10 sessions have been utilised. Exercise programs will be  
14  
15 documented according to the Consensus on Exercise Reporting Template (CERT)  
16  
17 guidelines<sup>20</sup> which has been adapted specifically for recording PFMT programs by Hall et  
18  
19 al.<sup>21</sup>.

### 22 23 *Conventional training*

24  
25  
26 The Conventional PFMT is focused on repeated maximal contraction of the muscles  
27  
28 around the anus and follows the principles of the program<sup>13</sup> used in the largest previous RCT  
29  
30 for men with PPI<sup>22</sup>. Training commences with an assessment of muscle activation (digital  
31  
32 rectal examination or anal surface electromyography (EMG)). Participants perform 3-s  
33  
34 maximal contractions in lying, sitting and standing, two times per day, and also before  
35  
36 activities such as coughing, lifting, rising from sitting. Daily home exercise are encouraged  
37  
38 and monitored by a physiotherapist. Training progresses by increasing the duration of  
39  
40 contractions, up to 10 s.

### 41 42 *Urethral training*

43  
44  
45 Urethral training is an individualised PFMT program focused on the striated pelvic  
46  
47 floor muscles that constrict the urethra (SUS, PR, BC) with progression according to a  
48  
49 decision tool developed with a Clinical Advisory Committee. Exercise relies on the principles  
50  
51 of motor learning, skill training and exercise physiology. Training uses transperineal  
52  
53 ultrasound imaging for assessment of pelvic floor muscle activation during voluntary  
54  
55 contraction, coughing and a 60-s maximal contraction<sup>11 15 23</sup> to guide treatment tailoring.  
56  
57  
58  
59  
60

1  
2  
3 Transperineal ultrasound imaging is also used for biofeedback at each physiotherapy session.  
4  
5 Urethral training commences with skill acquisition of the optimal pattern of pelvic floor  
6  
7 muscle activation to increase urethral pressure and avoidance of excessive abdominal muscle  
8  
9 contraction. Initial training focusses on SUS, but with tailoring to include the other muscles,  
10  
11 based on the assessment. Progression includes: training for activation of pelvic floor muscles  
12  
13 in functional tasks; bladder training to increase holding capacity; sustained holding to  
14  
15 enhance adaptation of striated muscles to provide ongoing maintenance of continence;  
16  
17 training of ballistic efforts for episodes of increased bladder pressure (lifting, coughing, etc);  
18  
19 and high-performance training including strength training to prepare for demanding tasks.  
20  
21 Daily home exercise to practice tasks taught in each session will be encouraged and  
22  
23 monitored by a physiotherapist.  
24  
25  
26  
27

### 28 *No training*

29  
30 Participants allocated to *No training* will attend a pre-operative session with a  
31  
32 physiotherapist during which they will receive standard written education material (similar to  
33  
34 the online-resources readily available from prostate cancer support groups) and education  
35  
36 about how to perform the outcome measures.  
37  
38

39  
40 Participants in all groups will be requested to refrain from seeking additional  
41  
42 treatment until the primary end-point at 3 months. Any treatment sought by participants will  
43  
44 be recorded.  
45  
46

47  
48 Physiotherapists will be trained to apply one treatment only. They will have prior  
49  
50 experience with management of incontinence and will undergo sufficient training to ensure  
51  
52 competence. Therapists providing *Urethral training* will receive comprehensive training in  
53  
54 transperineal ultrasound imaging. Competence of therapists will be formally assessed and  
55  
56 treatment fidelity evaluated by observation during a subset of sessions by a researcher to  
57  
58 document adherence to the protocol.  
59  
60

## Data collection

All data will be collected online using REDCap (Research Electronic Data Capture). Participants will complete an online questionnaire at baseline to provide demographic data including date of birth, height, weight, employment status, marital status, education level, smoker status and comorbidities. Prostate volume, Gleason score, surgery date, surgery type, surgery complications, date of catheter removal, and adjunct treatments will also be recorded. Primary and secondary data (except neuromuscular control measures) will be recorded with the online system according to the schedule outlined in Table 1. The primary endpoint at 3 months was selected as qualitative research highlights that rapid/complete recovery of continence is a priority for men<sup>24</sup> as long periods of incontinence have a major impact on quality-of-life<sup>25</sup>, and it was considered unethical to withhold treatment from men allocated to *No training* for more than 3 months if they continue to experience incontinence.

**Table 1:** Data collection timeline

| Time point                    | Enrolment | Baseline         | Allocation | Post-Allocation |                  |         |          |           |
|-------------------------------|-----------|------------------|------------|-----------------|------------------|---------|----------|-----------|
|                               |           | 1-2 weeks pre-op |            | ~1 week pre-op  | ~2 weeks post-op | 6 weeks | 3 months | 12 months |
| Enrolment:                    |           |                  |            |                 |                  |         |          |           |
| Eligibility screen            | X         |                  |            |                 |                  |         |          |           |
| Informed consent              | X         |                  |            |                 |                  |         |          |           |
| Randomisation                 |           |                  | X          |                 |                  |         |          |           |
| Interventions:                |           |                  |            |                 |                  |         |          |           |
| Urethral training             |           |                  |            |                 |                  |         |          |           |
| Conventional training         |           |                  |            |                 |                  |         |          |           |
| No training                   |           |                  |            | X               |                  |         |          |           |
| Assessments:                  |           |                  |            |                 |                  |         |          |           |
| 24-hour pad weight test *     |           | X                |            |                 |                  |         |          | X         |
| NM control measure            |           | X                |            |                 | X                | X       | X        | X         |
| ICS-male SF *                 |           | X                |            |                 |                  |         |          |           |
| IPAQ *                        |           | X                |            |                 |                  |         |          |           |
| SF-12 (weekly)                |           | X                |            |                 |                  |         |          |           |
| EQ-5D-5L (weekly)             |           | X                |            |                 |                  |         |          |           |
| Incontinence-related costs *  |           | X                |            |                 |                  |         |          |           |
| Sexual function (weekly)      |           | X                |            |                 |                  |         |          |           |
| Bowel function (weekly)       |           | X                |            |                 |                  |         |          |           |
| Treatment adherence (monthly) |           |                  |            |                 |                  |         |          |           |

NM = neuromuscular; ICS-male SF = International Continence Society Male Short Form; SF-12 = 12-item Short Form Survey; EQ-5D-5L = 5 level EuroQol 5 dimension, IPAQ = International Physical Activity Questionnaire; \* = weekly to primary end-point at 3 months, then monthly to 12 months

For secondary outcome measures of NM control, participants will attend laboratory sessions at baseline (prior to randomisation for identification of NM control parameters used for stratification and as moderator of treatment efficacy), ~2 weeks post-op after catheter removal (for secondary analysis of post-op NM control as a moderator of treatment efficacy), 6 weeks (for intermediate measurement of NM control to judge improvement in NM control

1  
2  
3 as a potential causal mediator of outcome) and 12 months (for secondary analysis of long-  
4 term outcome of intervention) (Table 1).  
5  
6

7  
8 Secondary outcomes (continence [continence questionnaire and 24-hour pad test],  
9 physical activity, quality of life, incontinence-related costs, and sexual function and bowel  
10 function) will be entered into the online data management system weekly until the primary  
11 end point at 3 months. All secondary outcomes will also be collected at 12 months. All men  
12 will continue to complete the continence [continence questionnaire and 24-hour pad test],  
13 physical activity, and incontinence-related costs data monthly until 12 months. Men will be  
14 prompted to complete this information via their preferred method (SMS, telephone or e-mail).  
15  
16  
17  
18  
19  
20  
21  
22  
23

#### 24 Treatment adherence

25  
26 Adherence to exercise will be encouraged by the treating physiotherapist and  
27 monitored using an online questionnaire. Physiotherapists will be trained to promote  
28 adherence to the program using principles of behaviour change including identification of  
29 barriers, cognitive analysis, prioritisation and action planning. Participants will be prompted  
30 monthly via their preferred method (SMS, telephone or e-mail) to input data of home exercise  
31 performance. This was selected rather than weekly measurement to avoid excessive  
32 prompting of the *No treatment* group.  
33  
34  
35  
36  
37  
38  
39  
40  
41

#### 42 Blinding

43  
44 Assessors and statisticians will be blinded to group allocation. It will not be possible  
45 to blind the participant or treating therapist to the treatment, but patients will be blinded to the  
46 hypotheses or details of treatments applied to other groups. Prior to randomisation  
47 participants will be informed that systematic reviews show uncertain evidence of benefit from  
48 PFMT (note that all men, including the *No treatment* group, will receive written information  
49 about PFMT).  
50  
51  
52  
53  
54  
55  
56  
57  
58  
59  
60

## Outcome measures

### *Primary Outcome*

The primary outcome measure will be the 24-hour pad weight test. It will be assessed at baseline and 3 months. Continence is defined as a loss of <2g of urine<sup>8</sup>. The day before laboratory testing, the SMS service will remind men to pre-weigh and retain all pads used for the next 24 hours in sealed plastic bags and weigh them using provided scales. Data will be provided to the research staff at the laboratory session. The dichotomous classification of continence will be the primary outcome, and the measure of pad weight (grams) recorded as a secondary outcome.

### *Secondary outcomes*

Ultrasound measures of NM control of urethral pressure: NM control of pelvic floor muscles will be assessed at baseline, post-surgery, 6 weeks, 3 months and 12 months during: (i) voluntary contraction of pelvic floor muscles; (ii) cough according to a protocol described by Stafford et al.<sup>11</sup>; (iii) maximal voluntary contraction sustained for 60 s, and (iv) repeated contractions. These measures have been validated as measure of activation of the individual pelvic floor muscles<sup>23</sup>.

Other secondary outcomes that will be measured as outlined in Table 1 are;

- (i) International Continence Society Male Short Form (incontinence subscale) (ICS-male SF): Measures the symptomatology and “bothersomeness” of incontinence for men with prostatic disease.
- (ii) Self-assessed 24-hour pad test: So that the test can be completed at home, men will be provided with a digital scale to weigh all pads used in a 24-hour period. The start and end of the test will be prompted using the SMS service and a bladder diary will be collected for this period.

- 1  
2  
3  
4  
5  
6  
7  
8  
9  
10  
11  
12  
13  
14  
15  
16  
17  
18  
19  
20  
21  
22  
23  
24  
25  
26  
27  
28  
29  
30  
31  
32  
33  
34  
35  
36  
37  
38  
39  
40  
41  
42  
43  
44
- (iii) International Physical Activity Questionnaire (IPAQ): Used to assess physical activity over the same period as the 24-hour pad weight test.
  - (iv) 12-Item Short Form Survey (SF-12)<sup>26</sup>: Used to measure health-related quality of life based on recommendations of a recent systematic review of quality-of-life measures for prostate cancer<sup>27</sup>. The SF-6D computation may also be applied to SF-12 data to compute the utility weights required to construct Quality-Adjusted Life-Year (QALY) measures for use in the cost-effectiveness analysis.
  - (v) EQ-5D-5L<sup>28</sup>: Used to calculate the QALY saved for cost-effectiveness analysis.
  - (vi) Incontinence-related costs (use of health services/devices): Recorded prospectively for every participant for 12 months. Men will be prompted to input data using the data collection system. Data will include visits to health care practitioners (e.g. therapists, GP), drugs, and number of devices such as pads or bed/chair protectors used.
  - (vii) Sexual function: Determined using the question "Are you currently able to achieve a full erection?".
  - (viii) Bowel function: Determined using questions previously described in a clinical trial of post-prostatectomy incontinence<sup>29</sup>.

#### 45 Data Integrity

46 All data will be directly collected into the REDCap Electronic Data Capture program.  
47  
48 Any inconsistencies in the data will be explored and resolved. The database will be backed-  
49  
50 up regularly on a secure network and be compliant to the ICH Guideline for Good Clinical  
51  
52 Practice<sup>30</sup>, according to our Data Management Plan. Study personnel will only be able to  
53  
54 access the database with a personal login and password.  
55  
56  
57  
58  
59  
60



## Retention of documents

Study investigators will maintain adequate and accurate records to enable the conduct of the study to be fully documented and the study data to be subsequently verified. After completion of the study, study data will be archived by The University of Queensland for a minimum of 15 years.

## Data analysis

### *Primary endpoint and sample size justification*

The primary outcome is the proportion of participants continent at 3 months. This study is powered to determine whether the *Urethral training* is more efficacious than *Conventional training*. This difference is expected to be smaller than the difference between *Urethral* and *No training*. Data from seven RCTs (see <sup>31</sup>) indicate ~60% of men receiving *Conventional training* will be incontinent at 3 months. With 97 men per group, a reduction of incontinence by a third to 40% of men at 3 months (conservatively based on the difference identified in a previous study <sup>8</sup>, which included some features we consider critical in the proposed program) can be detected with 80% power and a two-sided significance level of 0.05

Our data of healthy men suggest ~55% have good baseline NM control (Stafford et al., 2018 unpublished data), defined as ability to achieve both  $\geq 4.1$  mm of SUS displacement and  $\geq 2.4$  mm of PR displacement as assessed with transperineal ultrasound imaging during voluntary contraction (Stafford et al., 2018 unpublished data). We make the assumption that among those with good baseline NM control, incontinence outcomes at 3 months will be similar regardless of treatment arm. With these assumptions and sample size, we have 88% power to detect a significant interaction between baseline NM control and treatment arm if we assume that 70% of men with good baseline NM control will be continent at 3 months regardless of treatment, but that, of the men with poor baseline NM control, 90% and 50%

1  
2  
3 will be continent with *Urethral* or *Conventional training*, respectively. We will recruit 121  
4  
5 men per arm (adjusting for a potential drop-out rate of 20%). This is feasible based on a  
6  
7 recent RCT of 308 participants<sup>6</sup> from a subset of our referral sources.  
8  
9

### 10 *Statistical analysis*

11  
12 A biostatistician (JK) will analyse blinded data, with all patients enrolled and  
13  
14 randomised to treatment/no treatment arms comprising the data set for analysis. Baseline  
15  
16 characteristics of groups will be tabulated using summary statistics. If required, multiple  
17  
18 imputation will be used to account for missing data, with imputation conducted separately for  
19  
20 each treatment arm.  
21  
22

### 23 *Primary analysis*

24  
25 Analyses will be by intention-to-treat of all randomised participants. For the binary  
26  
27 continence outcome, a hierarchical logistic regression model including random effects to  
28  
29 account for multiple measurements per participant, and random effects for physiotherapists,  
30  
31 will be fit. This model will include a three-way interaction term between time, randomised  
32  
33 treatment group, and baseline NM control, and all 2-way interactions and main effects, as  
34  
35 well as the stratifying variable of surgeon. For the primary hypothesis, this model will be  
36  
37 interrogated to yield differences in the proportions of participants recovering continence at 3  
38  
39 months between the groups and 95% confidence intervals<sup>32</sup>. The model will be similarly  
40  
41 interrogated to determine whether the effect of *Urethral training* relative to *Conventional*  
42  
43 *training* is moderated by NM control at baseline. Post-operative NM control measures will be  
44  
45 considered in a secondary analysis.  
46  
47  
48  
49  
50

### 51 *Secondary analyses*

52  
53 The continuous measure of continence (24-hour pad test – pad weight) and other  
54  
55 continuous outcomes (ICS-male SF, SF12, EQ-5D-5L, sexual function, and bowel function)  
56  
57 will be compared between groups by fitting similar random effects linear regression models.  
58  
59  
60

1  
2  
3 Time to recovery of continence will be compared between groups using a Cox proportional  
4 hazards model using the weekly self-assessed pad test. Model assumptions (linearity,  
5 normality and homoscedasticity of residuals for the linear regression models, and  
6 proportional hazards) will be assessed using standard diagnostic plots.  
7  
8  
9

10  
11  
12 **Mediation analysis:** To determine the extent to which the effect of *Urethral training* on the  
13 primary outcome and on the continuous measurement of continence is mediated through an  
14 improvement in NM control, as hypothesised, we will apply a causal mediation analysis<sup>33</sup>.  
15  
16  
17 Mediation analyses will be conducted treating the 6-week and 3-month NM control measures  
18 as the potential mediators, with all analyses adjusted for baseline NM control and other  
19 potential confounders of the outcome-mediator relationship (e.g. prostate volume, Gleason  
20 score, age, etc.). The analysis will be conducted in two stages: at the first stage, the effect of  
21 randomisation to the study arms on NM control measures will be assessed. In the second  
22 stage, models will be fit to estimate the direct effect of randomised group on outcome and the  
23 indirect effect of randomised group on the outcome that acts through the putative mediator.  
24  
25  
26 Whether the indirect effect of treatment on the outcomes changes depending on the level of  
27 NM control achieved after surgery will be investigated through the inclusion of interaction  
28 terms between treatment group and post-surgery NM control variables in the mediation  
29 analyses.  
30  
31  
32  
33  
34  
35  
36  
37  
38  
39  
40  
41  
42  
43  
44

45 If significant mediation is found, logistic regression will be undertaken using the 3-  
46 month data of the NM control variables to determine which variables are best linked with  
47 continence. A factor analysis across all participants will be applied to extract common NM  
48 control features from the NM control variables. NM control features will then be used as  
49 predictor variables in the logistic regression analysis to assess the relative contribution of  
50 each to the odds of regaining continence.  
51  
52  
53  
54  
55  
56  
57  
58  
59  
60

1  
2  
3 **Cost effectiveness analysis:** Costs of services and devices will be estimated using market  
4 prices. We will undertake two analyses. First, we will compare cost-effectiveness between  
5 treatment arms (3- and 12-month data). Second, we will address the question of whether  
6 treatment is more cost-effective if only offered to men with poor NM control at baseline. For  
7 this analysis we will test the interaction between treatment arm and baseline NM control.  
8 This will test the hypothesis that continence-related costs will be similar for men with good  
9 NM control, regardless of treatment allocation, but costs will be significantly less for men  
10 with poor baseline NM control allocated to *Urethral training*. Quality-adjusted life-years  
11 saved (QALYs) will be computed using the EQ-5D-5L data and SF-12 data, using an SF6D  
12 algorithm. Cost-effectiveness ratios will be computed and n-way sensitivity analyses will be  
13 conducted to produce cost-effectiveness acceptability curves for relevant sets of assumptions  
14 about costs and outcomes.

### 30 *Contamination between groups*

31  
32  
33 We do not anticipate contamination between *Urethral training* and *Conventional*  
34 *training* as different therapists will apply each intervention. Further, ultrasound imaging is  
35 required for the *Urethral training* and is not available to the other groups. It is possible that  
36 men allocated to *No treatment* will be exposed to information regarding PFMT (in addition to  
37 that provided to them in written form at the pre-surgery visit to the physiotherapist) through  
38 searching the internet and from friends and family. However, evidence from several trials  
39 shows that provision of information alone does not lead to clinical improvement<sup>31</sup>.

### 49 *Ethics and dissemination*

50  
51  
52  
53 This study is supported by grants from the National Health and Medical Research  
54 Council of Australia and Queensland Health, is registered with the Australian New Zealand  
55 Clinical Trials Registry, and has ethical approval from the Human Research Ethics  
56 Committees of The University of Queensland (2017001736), Uniting Care  
57  
58  
59  
60

(UCHHREC1739), and Metro South (HREC/17/QPAH/591)(Table 2). The funders have not contributed to the design of the trial, nor will they be involved in its conduct or management. The current protocol is version 2 (2<sup>nd</sup> May 2018) and any future protocol modifications would require approval by the principal investigator (PWH) and formal amendment.

**Table 2:** Trial registration data

| Data category                                 | Information                                                                                                                                   |
|-----------------------------------------------|-----------------------------------------------------------------------------------------------------------------------------------------------|
| Primary registry and trial identifying number | Australia New Zealand Clinical Trials Registry<br>[ACTRN12617000788370]                                                                       |
| Date of registration in primary registry      | 30/05/2017                                                                                                                                    |
| Secondary identifying numbers                 | Universal Trial Number U1111-1196-7696                                                                                                        |
| Sources of monetary or material support       | Sponsors (below)                                                                                                                              |
| Primary sponsor                               | National Health and Medical Research Council -<br>Research Committee Secretariat NHMRC, GPO<br>Box 1421, Canberra, ACT 2601                   |
| Secondary sponsor                             | Queensland Health Physiotherapy Research<br>Fellowship - Queensland Health Building<br>147-163 Charlotte Street, Brisbane, Queensland<br>4000 |
| Contact for public queries                    | RS (r.stafford@uq.edu.au)                                                                                                                     |
| Contact for scientific queries                | RS (r.stafford @uq.edu.au)                                                                                                                    |
| Public title                                  | Personalised pelvic floor Muscle Training for<br>Urinary incontinence after Prostatectomy                                                     |

|                                      |                                                                                                                                                                                                                                                           |
|--------------------------------------|-----------------------------------------------------------------------------------------------------------------------------------------------------------------------------------------------------------------------------------------------------------|
| Scientific title                     | Efficacy of a personalised pelvic floor Muscle Training program on Urinary incontinence after radical Prostatectomy: A randomised clinical trial with embedded physiological studies                                                                      |
| Countries of recruitment             | Australia                                                                                                                                                                                                                                                 |
| Health condition or problem studied  | Post-prostatectomy incontinence                                                                                                                                                                                                                           |
| Intervention                         | Urethral muscle training - comprehensive individualized program focused on training the striated muscles that pressurise the urethra.                                                                                                                     |
| Key inclusion and exclusion criteria | Inclusion criteria: aged 30 to 70 years; scheduled to undergo radical prostatectomy for prostate cancer; able to attend assessment and treatment sessions; able to understand English                                                                     |
|                                      | Exclusion criteria: urinary incontinence prior to surgery; previous prostate/urethral surgery; assessment/training of pelvic floor muscles in preceding 6 months; scheduled to undergo or had previously undergone radiation therapy for prostate cancer. |
| Study type                           | Randomised controlled trial, assessor and statistician blinding, automatic independent randomisation                                                                                                                                                      |
| Date of first enrolment              | 27/07/2018                                                                                                                                                                                                                                                |
| Target sample size                   | 363                                                                                                                                                                                                                                                       |
| Recruitment status                   | Recruiting                                                                                                                                                                                                                                                |

|                        |                                                                                                                                                                                                                                                                                                                                        |
|------------------------|----------------------------------------------------------------------------------------------------------------------------------------------------------------------------------------------------------------------------------------------------------------------------------------------------------------------------------------|
| Primary outcome(s)     | Continence defined by the 24-hour pad weight test                                                                                                                                                                                                                                                                                      |
| Key secondary outcomes | 12-Item Short Form Survey (SF-12); International Continence Society Male Short Form Questionnaire; Continenence-related costs; 24-hour pad test; Measures of neuro-muscular control of urethral pressure; International Physical Activity Questionnaire (IPAQ); EQ-5D-5L questionnaire; Questions related to sexual and bowel function |

Potential participants will be invited to participate via their treating urologist. To manage this unequal relationship, potential participants will be informed that trial assessments and interventions are not part of their routine care, that they are free to decide to participate without coercion, and that the decision to not participate will not influence their management or relationship with their urologist. Although the urologist may discuss the trial with the patient, they will not be involved in the screening or consent process, nor any of the assessment or training sessions.

As standard practice at the Princess Alexandra Hospital involves provision of written information only, no treatment will be withheld from patients. If a patient continues to experience incontinence at the completion of the primary endpoint we will provide them with information of treatment options.

Participants will be given contact details of the project manager for queries or concerns. As all treatments are low risk no adverse events are anticipated, but if any do occur they will be recorded and reported. Records of complaints arising from the trial will be acted upon in accordance with institutional policy. Participants will be informed they are free to

1  
2  
3 withdraw from the study at any time. They will be given the option to receive the results of  
4  
5 the study in summary format at the conclusion of the trial.  
6  
7

8 Participant data sheets will be stored in a locked cabinet, in addition to electronic  
9  
10 storage of scanned copies on the secure institutional data server. All other data will be stored  
11  
12 in electronic format in a de-identified manner. Consent forms (that include both a code and  
13  
14 identifiable information) will be stored separately to the coded data in a locked cabinet.  
15  
16 The data collected in this trial will be thoroughly analysed and published. As this data will be  
17  
18 specific to the interventions provided, we do not anticipate any secondary use of the  
19  
20 information. The trial consent form includes the option to opt out of making data available for  
21  
22 future analyses.  
23  
24  
25

26 The results will be disseminated through publication in peer-reviewed scientific  
27  
28 journals and presented at major international scientific meetings. Further, the study outcomes  
29  
30 will be disseminated to the broader community through paper-based and online media.  
31  
32  
33  
34  
35

### 36 Authors' contributions

37  
38

39 All authors have contributed to the design of the trial and preparation of the protocol  
40  
41 manuscript.  
42  
43

### 44 Funding statement

45  
46  
47

48 This clinical trial is supported by the National Health and Medical Research Council  
49  
50 (NHMRC) of Australia (APP1146267) and a Queensland Health Physiotherapy Research  
51  
52 Fellowship grant. PH is supported by a NHMRC Senior Principal Research Fellowship  
53  
54 (APP1102905).  
55  
56  
57  
58  
59  
60



1  
2  
3  
4  
5  
6  
7  
8  
9  
10  
11  
12  
13  
14  
15  
16  
17  
18  
19  
20  
21  
22  
23  
24  
25  
26  
27  
28  
29  
30  
31  
32  
33  
34  
35  
36  
37  
38  
39  
40  
41  
42  
43  
44  
45  
46  
47  
48  
49  
50  
51  
52  
53  
54  
55  
56  
57  
58  
59  
60

### Competing interests statement

No authors have any competing interests to declare.

For peer review only

## References

1. AIHW. Cancer in Australia 2017. . Cancer series no101. Canberra: AIHW, 2017.
2. Litwin MS, Melmed GY, Nakazon T. Life after radical prostatectomy: a longitudinal study. *J Urol* 2001;166(2):587-92.
3. Kao TC, Cruess DF, Garner D, et al. Multicenter patient self-reporting questionnaire on impotence, incontinence and stricture after radical prostatectomy. *J Urol* 2000;163(3):858-64.
4. Fowler FJ, Jr., Barry MJ, Lu-Yao G, et al. Effect of radical prostatectomy for prostate cancer on patient quality of life: results from a Medicare survey. *Urol* 1995;45(6):1007-13.
5. Katz G, Rodriguez R. Changes in continence and health-related quality of life after curative treatment and watchful waiting of prostate cancer. *Urol* 2007;69(6):1157-60. doi: 10.1016/j.urology.2007.02.003
6. Yaxley JW, Coughlin GD, Chambers SK, et al. Robot-assisted laparoscopic prostatectomy versus open radical retropubic prostatectomy: early outcomes from a randomised controlled phase 3 study. *Lancet* 2016;388(10049):1057-66.
7. Dumoulin C, Hay-Smith J. Pelvic floor muscle training versus no treatment, or inactive control treatments, for urinary incontinence in women. *Cochrane Database Syst Rev* 2010(1):CD005654.
8. Van Kampen M, De Weerd W, Van Poppel H, et al. Effect of pelvic-floor re-education on duration and degree of incontinence after radical prostatectomy: a randomised controlled trial. *Lancet* 2000;355(9198):98-102.
9. Campbell SE, Glazener CM, Hunter KF, et al. Conservative management for postprostatectomy urinary incontinence. *Cochrane Database Syst Rev* 2012;1:CD001843.

- 1  
2  
3 10. Stafford RE, Ashton-Miller JA, Constantinou CE, et al. A new method to quantify male  
4  
5 pelvic floor displacement from 2D transperineal ultrasound images. *Urology*  
6  
7 2013;81(3):685-9.  
8  
9
- 10 11. Stafford RE, van den Hoorn W, Coughlin G, et al. Postprostatectomy incontinence is  
11  
12 related to pelvic floor displacements observed with trans-perineal ultrasound imaging.  
13  
14 *Neurourol Urodyn* 2018;37(2):658-65.  
15  
16
- 17 12. Stafford RE, Sapsford R, Ashton-Miller J, et al. A novel transurethral surface electrode to  
18  
19 record male striated urethral sphincter electromyographic activity. *J Urol*  
20  
21 2010;183(1):378-85.  
22  
23
- 24 13. Dorey G, Glazener C, Buckley B, et al. Developing a pelvic floor muscle training  
25  
26 regimen for use in a trial intervention. *Physiotherapy* 2009;95(3):199-209.  
27  
28
- 29 14. Stafford RE, Ashton-Miller JA, Constantinou CE, et al. Novel insight into the dynamics  
30  
31 of male pelvic floor contractions through transperineal ultrasound imaging. *J Urol*  
32  
33 2012;188(4):1224-30.  
34  
35
- 36 15. Stafford RE, Mazzone S, Ashton-Miller JA, et al. Dynamics of male pelvic floor muscle  
37  
38 contraction observed with transperineal ultrasound imaging differ between voluntary  
39  
40 and evoked coughs. *J Appl Physiol* 2014;116(8):953-60.  
41  
42
- 43 16. Desautel MG, Kapoor R, Badlani GH. Sphincteric incontinence: the primary cause of  
44  
45 post-prostatectomy incontinence in patients with prostate cancer. *Neurourol Urodyn*  
46  
47 1997;16(3):153-60.  
48
- 49 17. Presti JC, Jr., Schmidt RA, Narayan PA, et al. Pathophysiology of urinary incontinence  
50  
51 after radical prostatectomy. *J Urol* 1990;143(5):975-8.  
52  
53
- 54 18. Groutz A, Blaivas JG, Chaikin DC, et al. The pathophysiology of post-radical  
55  
56 prostatectomy incontinence: a clinical and video urodynamic study. *J Urol*  
57  
58 2000;163(6):1767-70.  
59  
60

- 1  
2  
3 19. Chan AW, Tetzlaff JM, Altman DG, et al. SPIRIT 2013 statement: defining standard  
4 protocol items for clinical trials. *Ann Intern Med* 2013;158(3):200-7. doi:  
5 10.7326/0003-4819-158-3-201302050-00583  
6  
7  
8  
9  
10 20. Slade SC, Dionne CE, Underwood M, et al. Consensus on Exercise Reporting Template  
11 (CERT): Explanation and Elaboration Statement. *Br J Sports Med* 2016;50(23):1428-  
12 37.  
13  
14  
15  
16  
17 21. Hall M, Hinman RS, Wrigley TV, et al. The effects of neuromuscular exercise on medial  
18 knee joint load post-arthroscopic partial medial meniscectomy: 'SCOPEX' a  
19 randomised control trial protocol. *BMC Musculoskelet Disord* 2012;13:233.  
20  
21  
22  
23  
24 22. Glazener C, Boachie C, Buckley B, et al. Urinary incontinence in men after formal one-  
25 to-one pelvic-floor muscle training following radical prostatectomy or transurethral  
26 resection of the prostate (MAPS): two parallel randomised controlled trials. *Lancet*  
27 2011;378(9788):328-37.  
28  
29  
30  
31  
32  
33 23. Stafford RE, Coughlin G, Lutton NJ, et al. Validity of Estimation of Pelvic Floor Muscle  
34 Activity from Transperineal Ultrasound Imaging in Men. *PLoS One*  
35 2015;10(12):e0144342.  
36  
37  
38  
39  
40 24. Cooperberg MR, Master VA, Carroll PR. Health related quality of life significance of  
41 single pad urinary incontinence following radical prostatectomy. *J Urol* 2003;170(2  
42 Pt 1):512-5.  
43  
44  
45  
46  
47 25. Kirschner-Hermanns R, Jakse G. Quality of life following radical prostatectomy. *Crit Rev*  
48 *Oncol/Hematol* 2002;43(2):141-51.  
49  
50  
51 26. Ware J, Jr., Kosinski M, Keller SD. A 12-Item Short-Form Health Survey: construction of  
52 scales and preliminary tests of reliability and validity. *Med Care* 1996;34(3):220-33.  
53  
54  
55  
56  
57  
58  
59  
60

- 1  
2  
3 27. Hamoen EH, De Rooij M, Witjes JA, et al. Measuring health-related quality of life in  
4  
5 men with prostate cancer: A systematic review of the most used questionnaires and  
6  
7 their validity. *Urol Oncol* 2015;33(2):69 e19-28.  
8  
9  
10 28. Herdman M, Gudex C, Lloyd A, et al. Development and preliminary testing of the new  
11  
12 five-level version of EQ-5D (EQ-5D-5L). *Qual Life Res* 2011;20(10):1727-36.  
13  
14 29. Glazener C, Boachie C, Buckley B, et al. Conservative treatment for urinary incontinence  
15  
16 in Men After Prostate Surgery (MAPS): two parallel randomised controlled trials.  
17  
18 *Health Technol Assess* 2011;15(24):1-290, iii-iv.  
19  
20  
21 30. ICH. ICH Guideline for Good Clinical Practice, 2016.  
22  
23  
24 31. Anderson CA, Omar MI, Campbell SE, et al. Conservative management for  
25  
26 postprostatectomy urinary incontinence. *Cochrane Database Syst Rev*  
27  
28 2015;1:CD001843.  
29  
30  
31 32. Muller CJ, MacLehose RF. Estimating predicted probabilities from logistic regression:  
32  
33 different methods correspond to different target populations. *Int J Epidemiol*  
34  
35 2014;43(3):962-70.  
36  
37  
38 33. Emsley R, Dunn G, White IR. Mediation and moderation of treatment effects in  
39  
40 randomised controlled trials of complex interventions. *Stat Method Med Res*  
41  
42 2010;19(3):237-70.  
43  
44  
45  
46  
47  
48  
49  
50  
51  
52  
53  
54  
55  
56  
57  
58  
59  
60

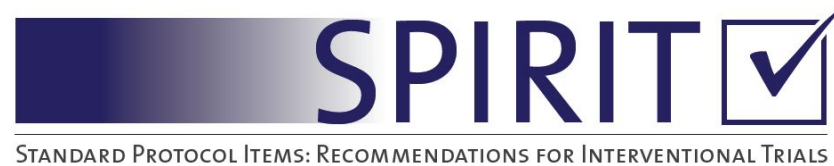

SPIRIT 2013 Checklist: Recommended items to address in a clinical trial protocol and related documents\*

| Section/item                      | Item No | Description                                                                                                                                                                                                                                                                              | Addressed on page number |
|-----------------------------------|---------|------------------------------------------------------------------------------------------------------------------------------------------------------------------------------------------------------------------------------------------------------------------------------------------|--------------------------|
| <b>Administrative information</b> |         |                                                                                                                                                                                                                                                                                          |                          |
| Title                             | 1       | Descriptive title identifying the study design, population, interventions, and, if applicable, trial acronym                                                                                                                                                                             | ___ 1 ___                |
| Trial registration                | 2a      | Trial identifier and registry name. If not yet registered, name of intended registry                                                                                                                                                                                                     | ___ 2 ___                |
|                                   | 2b      | All items from the World Health Organization Trial Registration Data Set                                                                                                                                                                                                                 | ___ 19 ___               |
| Protocol version                  | 3       | Date and version identifier                                                                                                                                                                                                                                                              | ___ 19 ___               |
| Funding                           | 4       | Sources and types of financial, material, and other support                                                                                                                                                                                                                              | ___ 19, 22 ___           |
| Roles and responsibilities        | 5a      | Names, affiliations, and roles of protocol contributors                                                                                                                                                                                                                                  | ___ 1, 22 ___            |
|                                   | 5b      | Name and contact information for the trial sponsor                                                                                                                                                                                                                                       | ___ 19 ___               |
|                                   | 5c      | Role of study sponsor and funders, if any, in study design; collection, management, analysis, and interpretation of data; writing of the report; and the decision to submit the report for publication, including whether they will have ultimate authority over any of these activities | ___ 19 ___               |
|                                   | 5d      | Composition, roles, and responsibilities of the coordinating centre, steering committee, endpoint adjudication committee, data management team, and other individuals or groups overseeing the trial, if applicable (see Item 21a for data monitoring committee)                         | ___ N/A ___              |

|    |                                                           |     |                                                                                                               |               |
|----|-----------------------------------------------------------|-----|---------------------------------------------------------------------------------------------------------------|---------------|
| 1  | <b>Introduction</b>                                       |     |                                                                                                               |               |
| 2  |                                                           |     |                                                                                                               |               |
| 3  | Background and                                            | 6a  | Description of research question and justification for undertaking the trial, including summary of relevant   | ___ 4-5 ___   |
| 4  | rationale                                                 |     | studies (published and unpublished) examining benefits and harms for each intervention                        |               |
| 5  |                                                           |     |                                                                                                               |               |
| 6  |                                                           | 6b  | Explanation for choice of comparators                                                                         | ___ 4-5 ___   |
| 7  |                                                           |     |                                                                                                               |               |
| 8  | Objectives                                                | 7   | Specific objectives or hypotheses                                                                             | ___ 5-6 ___   |
| 9  |                                                           |     |                                                                                                               |               |
| 10 | Trial design                                              | 8   | Description of trial design including type of trial (eg, parallel group, crossover, factorial, single group), |               |
| 11 |                                                           |     | allocation ratio, and framework (eg, superiority, equivalence, noninferiority, exploratory)                   | ___ 6 ___     |
| 12 |                                                           |     |                                                                                                               |               |
| 13 |                                                           |     |                                                                                                               |               |
| 14 | <b>Methods: Participants, interventions, and outcomes</b> |     |                                                                                                               |               |
| 15 |                                                           |     |                                                                                                               |               |
| 16 | Study setting                                             | 9   | Description of study settings (eg, community clinic, academic hospital) and list of countries where data will | ___ 6 ___     |
| 17 |                                                           |     | be collected. Reference to where list of study sites can be obtained                                          |               |
| 18 |                                                           |     |                                                                                                               |               |
| 19 | Eligibility criteria                                      | 10  | Inclusion and exclusion criteria for participants. If applicable, eligibility criteria for study centres and  | ___ 6-7 ___   |
| 20 |                                                           |     | individuals who will perform the interventions (eg, surgeons, psychotherapists)                               |               |
| 21 |                                                           |     |                                                                                                               |               |
| 22 | Interventions                                             | 11a | Interventions for each group with sufficient detail to allow replication, including how and when they will be | ___ 8-9 ___   |
| 23 |                                                           |     | administered                                                                                                  |               |
| 24 |                                                           |     |                                                                                                               |               |
| 25 |                                                           | 11b | Criteria for discontinuing or modifying allocated interventions for a given trial participant (eg, drug dose  | ___ N/A ___   |
| 26 |                                                           |     | change in response to harms, participant request, or improving/worsening disease)                             |               |
| 27 |                                                           |     |                                                                                                               |               |
| 28 |                                                           | 11c | Strategies to improve adherence to intervention protocols, and any procedures for monitoring adherence        | ___ 12 ___    |
| 29 |                                                           |     | (eg, drug tablet return, laboratory tests)                                                                    |               |
| 30 |                                                           |     |                                                                                                               |               |
| 31 |                                                           | 11d | Relevant concomitant care and interventions that are permitted or prohibited during the trial                 | ___ 9 ___     |
| 32 |                                                           |     |                                                                                                               |               |
| 33 | Outcomes                                                  | 12  | Primary, secondary, and other outcomes, including the specific measurement variable (eg, systolic blood       | ___ 12-14 ___ |
| 34 |                                                           |     | pressure), analysis metric (eg, change from baseline, final value, time to event), method of aggregation (eg, |               |
| 35 |                                                           |     | median, proportion), and time point for each outcome. Explanation of the clinical relevance of chosen         |               |
| 36 |                                                           |     | efficacy and harm outcomes is strongly recommended                                                            |               |
| 37 |                                                           |     |                                                                                                               |               |
| 38 | Participant timeline                                      | 13  | Time schedule of enrolment, interventions (including any run-ins and washouts), assessments, and visits for   | ___ 11 ___    |
| 39 |                                                           |     | participants. A schematic diagram is highly recommended (see Figure)                                          |               |
| 40 |                                                           |     |                                                                                                               |               |
| 41 |                                                           |     |                                                                                                               |               |
| 42 |                                                           |     |                                                                                                               |               |
| 43 |                                                           |     |                                                                                                               |               |
| 44 |                                                           |     |                                                                                                               |               |
| 45 |                                                           |     |                                                                                                               |               |
| 46 |                                                           |     |                                                                                                               |               |

|   |             |    |                                                                                                                                                                                       |              |
|---|-------------|----|---------------------------------------------------------------------------------------------------------------------------------------------------------------------------------------|--------------|
| 1 | Sample size | 14 | Estimated number of participants needed to achieve study objectives and how it was determined, including clinical and statistical assumptions supporting any sample size calculations | _____15_____ |
| 2 |             |    |                                                                                                                                                                                       |              |
| 3 |             |    |                                                                                                                                                                                       |              |
| 4 | Recruitment | 15 | Strategies for achieving adequate participant enrolment to reach target sample size                                                                                                   | _____6_____  |
| 5 |             |    |                                                                                                                                                                                       |              |

### 6 **Methods: Assignment of interventions (for controlled trials)**

#### 7 Allocation:

|    |                                  |     |                                                                                                                                                                                                                                                                                                                                                          |               |
|----|----------------------------------|-----|----------------------------------------------------------------------------------------------------------------------------------------------------------------------------------------------------------------------------------------------------------------------------------------------------------------------------------------------------------|---------------|
| 8  |                                  |     |                                                                                                                                                                                                                                                                                                                                                          |               |
| 9  |                                  |     |                                                                                                                                                                                                                                                                                                                                                          |               |
| 10 | Sequence generation              | 16a | Method of generating the allocation sequence (eg, computer-generated random numbers), and list of any factors for stratification. To reduce predictability of a random sequence, details of any planned restriction (eg, blocking) should be provided in a separate document that is unavailable to those who enrol participants or assign interventions | _____7_____   |
| 11 |                                  |     |                                                                                                                                                                                                                                                                                                                                                          |               |
| 12 |                                  |     |                                                                                                                                                                                                                                                                                                                                                          |               |
| 13 |                                  |     |                                                                                                                                                                                                                                                                                                                                                          |               |
| 14 |                                  |     |                                                                                                                                                                                                                                                                                                                                                          |               |
| 15 |                                  |     |                                                                                                                                                                                                                                                                                                                                                          |               |
| 16 | Allocation concealment mechanism | 16b | Mechanism of implementing the allocation sequence (eg, central telephone; sequentially numbered, opaque, sealed envelopes), describing any steps to conceal the sequence until interventions are assigned                                                                                                                                                | _____7_____   |
| 17 |                                  |     |                                                                                                                                                                                                                                                                                                                                                          |               |
| 18 |                                  |     |                                                                                                                                                                                                                                                                                                                                                          |               |
| 19 |                                  |     |                                                                                                                                                                                                                                                                                                                                                          |               |
| 20 | Implementation                   | 16c | Who will generate the allocation sequence, who will enrol participants, and who will assign participants to interventions                                                                                                                                                                                                                                | _____7_____   |
| 21 |                                  |     |                                                                                                                                                                                                                                                                                                                                                          |               |
| 22 |                                  |     |                                                                                                                                                                                                                                                                                                                                                          |               |
| 23 |                                  |     |                                                                                                                                                                                                                                                                                                                                                          |               |
| 24 | Blinding (masking)               | 17a | Who will be blinded after assignment to interventions (eg, trial participants, care providers, outcome assessors, data analysts), and how                                                                                                                                                                                                                | _____12_____  |
| 25 |                                  |     |                                                                                                                                                                                                                                                                                                                                                          |               |
| 26 |                                  |     |                                                                                                                                                                                                                                                                                                                                                          |               |
| 27 |                                  | 17b | If blinded, circumstances under which unblinding is permissible, and procedure for revealing a participant's allocated intervention during the trial                                                                                                                                                                                                     | _____N/A_____ |
| 28 |                                  |     |                                                                                                                                                                                                                                                                                                                                                          |               |
| 29 |                                  |     |                                                                                                                                                                                                                                                                                                                                                          |               |
| 30 |                                  |     |                                                                                                                                                                                                                                                                                                                                                          |               |

### 31 **Methods: Data collection, management, and analysis**

|    |                         |     |                                                                                                                                                                                                                                                                                                                                                                                                              |                 |
|----|-------------------------|-----|--------------------------------------------------------------------------------------------------------------------------------------------------------------------------------------------------------------------------------------------------------------------------------------------------------------------------------------------------------------------------------------------------------------|-----------------|
| 32 |                         |     |                                                                                                                                                                                                                                                                                                                                                                                                              |                 |
| 33 | Data collection methods | 18a | Plans for assessment and collection of outcome, baseline, and other trial data, including any related processes to promote data quality (eg, duplicate measurements, training of assessors) and a description of study instruments (eg, questionnaires, laboratory tests) along with their reliability and validity, if known. Reference to where data collection forms can be found, if not in the protocol | _____13-14_____ |
| 34 |                         |     |                                                                                                                                                                                                                                                                                                                                                                                                              |                 |
| 35 |                         |     |                                                                                                                                                                                                                                                                                                                                                                                                              |                 |
| 36 |                         |     |                                                                                                                                                                                                                                                                                                                                                                                                              |                 |
| 37 |                         |     |                                                                                                                                                                                                                                                                                                                                                                                                              |                 |
| 38 |                         |     |                                                                                                                                                                                                                                                                                                                                                                                                              |                 |
| 39 |                         | 18b | Plans to promote participant retention and complete follow-up, including list of any outcome data to be collected for participants who discontinue or deviate from intervention protocols                                                                                                                                                                                                                    | _____12_____    |
| 40 |                         |     |                                                                                                                                                                                                                                                                                                                                                                                                              |                 |
| 41 |                         |     |                                                                                                                                                                                                                                                                                                                                                                                                              |                 |
| 42 |                         |     |                                                                                                                                                                                                                                                                                                                                                                                                              |                 |



|    |                                 |     |                                                                                                                                                                                                                                                                                                                                       |                 |
|----|---------------------------------|-----|---------------------------------------------------------------------------------------------------------------------------------------------------------------------------------------------------------------------------------------------------------------------------------------------------------------------------------------|-----------------|
| 1  | Data management                 | 19  | Plans for data entry, coding, security, and storage, including any related processes to promote data quality (eg, double data entry; range checks for data values). Reference to where details of data management procedures can be found, if not in the protocol                                                                     | _____14_____    |
| 2  |                                 |     |                                                                                                                                                                                                                                                                                                                                       |                 |
| 3  |                                 |     |                                                                                                                                                                                                                                                                                                                                       |                 |
| 4  |                                 |     |                                                                                                                                                                                                                                                                                                                                       |                 |
| 5  | Statistical methods             | 20a | Statistical methods for analysing primary and secondary outcomes. Reference to where other details of the statistical analysis plan can be found, if not in the protocol                                                                                                                                                              | _____16_____    |
| 6  |                                 |     |                                                                                                                                                                                                                                                                                                                                       |                 |
| 7  |                                 |     |                                                                                                                                                                                                                                                                                                                                       |                 |
| 8  |                                 | 20b | Methods for any additional analyses (eg, subgroup and adjusted analyses)                                                                                                                                                                                                                                                              | _____16-17_____ |
| 9  |                                 |     |                                                                                                                                                                                                                                                                                                                                       |                 |
| 10 |                                 | 20c | Definition of analysis population relating to protocol non-adherence (eg, as randomised analysis), and any statistical methods to handle missing data (eg, multiple imputation)                                                                                                                                                       | _____16_____    |
| 11 |                                 |     |                                                                                                                                                                                                                                                                                                                                       |                 |
| 12 |                                 |     |                                                                                                                                                                                                                                                                                                                                       |                 |
| 13 |                                 |     |                                                                                                                                                                                                                                                                                                                                       |                 |
| 14 | <b>Methods: Monitoring</b>      |     |                                                                                                                                                                                                                                                                                                                                       |                 |
| 15 |                                 |     |                                                                                                                                                                                                                                                                                                                                       |                 |
| 16 | Data monitoring                 | 21a | Composition of data monitoring committee (DMC); summary of its role and reporting structure; statement of whether it is independent from the sponsor and competing interests; and reference to where further details about its charter can be found, if not in the protocol. Alternatively, an explanation of why a DMC is not needed | _____N/A_____   |
| 17 |                                 |     |                                                                                                                                                                                                                                                                                                                                       |                 |
| 18 |                                 |     |                                                                                                                                                                                                                                                                                                                                       |                 |
| 19 |                                 |     |                                                                                                                                                                                                                                                                                                                                       |                 |
| 20 |                                 |     |                                                                                                                                                                                                                                                                                                                                       |                 |
| 21 |                                 |     |                                                                                                                                                                                                                                                                                                                                       |                 |
| 22 |                                 | 21b | Description of any interim analyses and stopping guidelines, including who will have access to these interim results and make the final decision to terminate the trial                                                                                                                                                               | _____N/A_____   |
| 23 |                                 |     |                                                                                                                                                                                                                                                                                                                                       |                 |
| 24 |                                 |     |                                                                                                                                                                                                                                                                                                                                       |                 |
| 25 | Harms                           | 22  | Plans for collecting, assessing, reporting, and managing solicited and spontaneously reported adverse events and other unintended effects of trial interventions or trial conduct                                                                                                                                                     | _____21_____    |
| 26 |                                 |     |                                                                                                                                                                                                                                                                                                                                       |                 |
| 27 |                                 |     |                                                                                                                                                                                                                                                                                                                                       |                 |
| 28 | Auditing                        | 23  | Frequency and procedures for auditing trial conduct, if any, and whether the process will be independent from investigators and the sponsor                                                                                                                                                                                           | _____10_____    |
| 29 |                                 |     |                                                                                                                                                                                                                                                                                                                                       |                 |
| 30 |                                 |     |                                                                                                                                                                                                                                                                                                                                       |                 |
| 31 |                                 |     |                                                                                                                                                                                                                                                                                                                                       |                 |
| 32 | <b>Ethics and dissemination</b> |     |                                                                                                                                                                                                                                                                                                                                       |                 |
| 33 |                                 |     |                                                                                                                                                                                                                                                                                                                                       |                 |
| 34 | Research ethics approval        | 24  | Plans for seeking research ethics committee/institutional review board (REC/IRB) approval                                                                                                                                                                                                                                             | _____18_____    |
| 35 |                                 |     |                                                                                                                                                                                                                                                                                                                                       |                 |
| 36 |                                 |     |                                                                                                                                                                                                                                                                                                                                       |                 |
| 37 | Protocol amendments             | 25  | Plans for communicating important protocol modifications (eg, changes to eligibility criteria, outcomes, analyses) to relevant parties (eg, investigators, REC/IRBs, trial participants, trial registries, journals, regulators)                                                                                                      | _____19_____    |
| 38 |                                 |     |                                                                                                                                                                                                                                                                                                                                       |                 |
| 39 |                                 |     |                                                                                                                                                                                                                                                                                                                                       |                 |
| 40 |                                 |     |                                                                                                                                                                                                                                                                                                                                       |                 |
| 41 |                                 |     |                                                                                                                                                                                                                                                                                                                                       |                 |
| 42 |                                 |     |                                                                                                                                                                                                                                                                                                                                       |                 |

|    |                               |     |                                                                                                                                                                                                                                                                                     |               |
|----|-------------------------------|-----|-------------------------------------------------------------------------------------------------------------------------------------------------------------------------------------------------------------------------------------------------------------------------------------|---------------|
| 1  | Consent or assent             | 26a | Who will obtain informed consent or assent from potential trial participants or authorised surrogates, and how (see Item 32)                                                                                                                                                        | ___ 6, 21 ___ |
| 2  |                               |     |                                                                                                                                                                                                                                                                                     |               |
| 3  |                               |     |                                                                                                                                                                                                                                                                                     |               |
| 4  |                               | 26b | Additional consent provisions for collection and use of participant data and biological specimens in ancillary studies, if applicable                                                                                                                                               | ___ N/A ___   |
| 5  |                               |     |                                                                                                                                                                                                                                                                                     |               |
| 6  |                               |     |                                                                                                                                                                                                                                                                                     |               |
| 7  | Confidentiality               | 27  | How personal information about potential and enrolled participants will be collected, shared, and maintained in order to protect confidentiality before, during, and after the trial                                                                                                | ___ 22 ___    |
| 8  |                               |     |                                                                                                                                                                                                                                                                                     |               |
| 9  |                               |     |                                                                                                                                                                                                                                                                                     |               |
| 10 | Declaration of interests      | 28  | Financial and other competing interests for principal investigators for the overall trial and each study site                                                                                                                                                                       | ___ 22 ___    |
| 11 |                               |     |                                                                                                                                                                                                                                                                                     |               |
| 12 |                               |     |                                                                                                                                                                                                                                                                                     |               |
| 13 | Access to data                | 29  | Statement of who will have access to the final trial dataset, and disclosure of contractual agreements that limit such access for investigators                                                                                                                                     | ___ 22 ___    |
| 14 |                               |     |                                                                                                                                                                                                                                                                                     |               |
| 15 |                               |     |                                                                                                                                                                                                                                                                                     |               |
| 16 | Ancillary and post-trial care | 30  | Provisions, if any, for ancillary and post-trial care, and for compensation to those who suffer harm from trial participation                                                                                                                                                       | ___ 21 ___    |
| 17 |                               |     |                                                                                                                                                                                                                                                                                     |               |
| 18 |                               |     |                                                                                                                                                                                                                                                                                     |               |
| 19 |                               |     |                                                                                                                                                                                                                                                                                     |               |
| 20 | Dissemination policy          | 31a | Plans for investigators and sponsor to communicate trial results to participants, healthcare professionals, the public, and other relevant groups (eg, via publication, reporting in results databases, or other data sharing arrangements), including any publication restrictions | ___ 22 ___    |
| 21 |                               |     |                                                                                                                                                                                                                                                                                     |               |
| 22 |                               |     |                                                                                                                                                                                                                                                                                     |               |
| 23 |                               |     |                                                                                                                                                                                                                                                                                     |               |
| 24 |                               | 31b | Authorship eligibility guidelines and any intended use of professional writers                                                                                                                                                                                                      | ___ N/A ___   |
| 25 |                               |     |                                                                                                                                                                                                                                                                                     |               |
| 26 |                               | 31c | Plans, if any, for granting public access to the full protocol, participant-level dataset, and statistical code                                                                                                                                                                     | ___ 22 ___    |
| 27 |                               |     |                                                                                                                                                                                                                                                                                     |               |
| 28 |                               |     |                                                                                                                                                                                                                                                                                     |               |
| 29 | <b>Appendices</b>             |     |                                                                                                                                                                                                                                                                                     |               |
| 30 |                               |     |                                                                                                                                                                                                                                                                                     |               |
| 31 | Informed consent materials    | 32  | Model consent form and other related documentation given to participants and authorised surrogates                                                                                                                                                                                  | ___ N/A ___   |
| 32 |                               |     |                                                                                                                                                                                                                                                                                     |               |
| 33 |                               |     |                                                                                                                                                                                                                                                                                     |               |
| 34 | Biological specimens          | 33  | Plans for collection, laboratory evaluation, and storage of biological specimens for genetic or molecular analysis in the current trial and for future use in ancillary studies, if applicable                                                                                      | ___ N/A ___   |
| 35 |                               |     |                                                                                                                                                                                                                                                                                     |               |
| 36 |                               |     |                                                                                                                                                                                                                                                                                     |               |

\*It is strongly recommended that this checklist be read in conjunction with the SPIRIT 2013 Explanation & Elaboration for important clarification on the items. Amendments to the protocol should be tracked and dated. The SPIRIT checklist is copyrighted by the SPIRIT Group under the Creative Commons "[Attribution-NonCommercial-NoDerivs 3.0 Unported](https://creativecommons.org/licenses/by-nc-nd/3.0/)" license.

# BMJ Open

## Efficacy of a personalised pelvic floor Muscle Training program on Urinary incontinence after radical Prostatectomy (MaTchUP): Protocol for a randomised controlled trial

|                                 |                                                                                                                                                                                                                                                                                                                                                                                                                                                                                                                                                                    |
|---------------------------------|--------------------------------------------------------------------------------------------------------------------------------------------------------------------------------------------------------------------------------------------------------------------------------------------------------------------------------------------------------------------------------------------------------------------------------------------------------------------------------------------------------------------------------------------------------------------|
| Journal:                        | <i>BMJ Open</i>                                                                                                                                                                                                                                                                                                                                                                                                                                                                                                                                                    |
| Manuscript ID                   | bmjopen-2018-028288.R1                                                                                                                                                                                                                                                                                                                                                                                                                                                                                                                                             |
| Article Type:                   | Protocol                                                                                                                                                                                                                                                                                                                                                                                                                                                                                                                                                           |
| Date Submitted by the Author:   | 18-Mar-2019                                                                                                                                                                                                                                                                                                                                                                                                                                                                                                                                                        |
| Complete List of Authors:       | Hodges, Paul; The University of Queensland, Stafford, Ryan; The University of Queensland Coughlin, Geoff; Royal Brisbane & Women's Hospital, Renal Medicine; Wesley Hospital<br>Kasza, Jessica; Monash University<br>Ashton-Miller, James; University of Michigan<br>Cameron, Anne; University of Michigan<br>Connelly, Luke ; University of Queensland, Centre for the Business and Economics of Health; University of Queensland, Poche Centre for Indigenous Health<br>Hall, Leanne; The University of Queensland, School of Health and Rehabilitation Sciences |
| <b>Primary Subject Heading</b>: | Urology                                                                                                                                                                                                                                                                                                                                                                                                                                                                                                                                                            |
| Secondary Subject Heading:      | Rehabilitation medicine, Evidence based practice                                                                                                                                                                                                                                                                                                                                                                                                                                                                                                                   |
| Keywords:                       | Prostate disease < UROLOGY, REHABILITATION MEDICINE, Urinary incontinences < UROLOGY, Clinical trials < THERAPEUTICS, Ultrasound < RADIOLOGY & IMAGING                                                                                                                                                                                                                                                                                                                                                                                                             |
|                                 |                                                                                                                                                                                                                                                                                                                                                                                                                                                                                                                                                                    |

SCHOLARONE™  
Manuscripts

1  
2  
3  
4  
5 Efficacy of a personalised pelvic floor Muscle Training program  
6  
7  
8  
9  
10 on Urinary incontinence after radical Prostatectomy  
11  
12  
13  
14 (MaTchUP): Protocol for a randomised controlled trial  
15  
16  
17  
18  
19

20 Paul W Hodges<sup>1</sup>, Ryan E Stafford<sup>1</sup>, Geoff Coughlin<sup>2</sup>, Jess Kasza<sup>3</sup>, James Ashton-Miller<sup>4</sup>,  
21  
22 Anne P. Cameron<sup>5</sup>, Luke Connelly<sup>6</sup>, Leanne Hall<sup>1</sup>  
23  
24  
25

26  
27 <sup>1</sup> School of Health and Rehabilitation Sciences, The University of Queensland, Brisbane,  
28  
29 Australia  
30

31  
32 <sup>2</sup> Wesley Urology Clinic, Brisbane, Australia  
33

34  
35 <sup>3</sup> Department of Epidemiology and Preventative Medicine, Monash University, Melbourne,  
36  
37 Australia  
38

39  
40 <sup>4</sup> Department of Mechanical Engineering, University of Michigan, Ann Arbor, USA  
41

42  
43 <sup>5</sup> Department of Urology, University of Michigan, Ann Arbor, USA  
44

45  
46 <sup>6</sup> Centre for the Business and Economics of Health, The University of Queensland, Australia;  
47  
48 and Department of Sociology and Business Law, The University of Bologna, Italy.

49  
50 **Corresponding author:** Paul W Hodges  
51  
52 School of Health and Rehabilitation Sciences,  
53 The University of Queensland, Brisbane, QLD 4072 Australia  
54  
55 Tel: +61 404 854 589  
56  
57 e-mail: [p.hodges@uq.edu.au](mailto:p.hodges@uq.edu.au)  
58  
59

60 **Word count:** 4130

1  
2  
3 **Keywords:** Radical prostatectomy, incontinence, prostate cancer, pelvic floor muscles,  
4  
5 rehabilitation  
6  
7

## 8 Abstract 9

10  
11 **Introduction:** Prostate cancer is the most common cancer in men. Prostatectomy is the most  
12 common treatment. Morbidity from prostatectomy is high - 80% of men experience urinary  
13 incontinence which negatively impacts quality-of-life. Post-surgical pelvic floor muscle  
14 training is commonly prescribed but recent systematic reviews found no evidence of efficacy.  
15 We propose a new treatment that commences pre-operatively and targets functional training  
16 of specific pelvic floor muscles that contribute to urinary continence. Assessment and  
17 biofeedback using transperineal ultrasound imaging assists training. This will be compared  
18 against conventional training (maximal pelvic floor muscle contraction assessed by digital  
19 rectal examination), and no training. Embedded physiological studies will allow the  
20 investigation of moderation and mediation of the treatment effect on the outcomes.  
21  
22

23  
24 **Methods and analysis:** This randomised clinical trial will include 363 men scheduled to  
25 undergo radical prostatectomy for prostate cancer. Participants will be randomised into  
26 *Urethral training*, *Conventional training*, and *No training* groups. Clinical data will be  
27 collected at baseline (1-2 weeks pre-surgery), and post-surgery after catheter removal, weekly  
28 to 3 months (primary endpoint), and monthly to 12 months. Outcomes include 24-hour pad  
29 weight test (primary), incontinence, quality-of-life and cost effectiveness data.  
30  
31

32  
33 Neuromuscular control measures of pelvic floor muscles will be measured at baseline, post-  
34 surgery, 6 weeks, 3 and 12 months. Study assessors and statistician will be blinded to the  
35 group allocation.  
36  
37

38  
39 **Ethics and dissemination:** This study is registered with the Australian New Zealand Clinical  
40 Trials Registry and has ethical approval from university and host hospital Ethics Committees.  
41  
42  
43  
44  
45  
46  
47  
48  
49  
50  
51  
52  
53  
54  
55  
56  
57  
58  
59  
60

1  
2  
3 Trial outcomes will be shared via national/international conference presentations and peer-  
4  
5 reviewed journal publications.  
6

7  
8 Trial registration number: ACTRN12617000788370 (registered 30<sup>th</sup> May 2017)  
9

## 10 Article Summary

### 11 12 13 14 Strengths and limitations of the study

- 15 • Uses randomised design in a clearly defined population
- 16  
17 • Tests an innovative intervention designed to target mechanisms of urinary continence  
18  
19 in men that is based on recent physiological data of mechanisms of continence and  
20  
21 incontinence in men  
22  
23 • Uses individualised care based on assessment using new transperineal ultrasound  
24  
25 imaging methods to study pelvic floor muscle function  
26  
27 • Includes investigation of mediation and moderation of the treatment effect by pelvic  
28  
29 floor muscle neuromuscular control variables  
30  
31 • Possible limitations are adherence to the comprehensive home program and the  
32  
33 burden of the extensive follow-up data collection  
34  
35  
36  
37  
38  
39  
40  
41  
42  
43  
44  
45  
46  
47  
48  
49  
50  
51  
52  
53  
54  
55  
56  
57  
58  
59  
60

## Introduction

Prostate cancer is the most common non-cutaneous cancer in men in Australia and internationally (1 in 7 men) and the second most common cause of cancer death<sup>1</sup>. Radical prostatectomy (prostate removal to prevent metastasis) is a common treatment. The good news is that prostate cancer has very high 5-yr survival - 95%<sup>1</sup>. The bad news is that morbidity is high – almost 80% of men experience incontinence after prostatectomy (post-prostatectomy incontinence: PPI)<sup>2</sup>, and many are incontinent beyond 12 months<sup>2</sup>. PPI has been identified as the major determinant of quality of life for these men, and many live for many years with ongoing major cost (up to 33% use incontinence products<sup>3</sup>) and social isolation<sup>4,5</sup>. Introduction of robotic prostatectomy has not reduced PPI<sup>6</sup>. Effective methods to reduce PPI are a priority.

Pelvic floor muscle training (PFMT) to enhance muscular control of urinary continence after prostatectomy is logical. Although efficacy of PFMT in female stress urinary incontinence has class 1 evidence<sup>7</sup>, early optimistic outcomes for PPI<sup>8</sup> are superseded by systematic review evidence of no efficacy in males<sup>9</sup>. Recent physiological research using innovative ultrasound imaging<sup>10,11</sup> and electromyography methods<sup>12</sup> suggests that conventional PFMT programs, which involves repeated maximal contractions assessed by digital rectal examination, and commenced after surgery<sup>13</sup>; fail to consider the mechanisms of incontinence after prostatectomy; are unlikely to target the muscles that control urinary continence; do not target the aspects of function that need to be trained; and start too late.

Urinary continence in men depends on contributions from smooth muscle of the urethra and urethral constriction generated by contraction of three striated muscles: the striated urethral sphincter (SUS); puborectalis/pubovisceralis (PR); and bulbocavernosus (BC)<sup>10</sup>. These striated muscles maintain gentle activation during urine storage<sup>12,14</sup> with additional activation when continence is challenged by elevated intra-abdominal pressure

1  
2  
3 such as coughing<sup>15</sup> or postural tasks<sup>14</sup>. Radical prostatectomy inherently removes the prostatic  
4 segment of the urethra, and its smooth muscle (called the internal sphincter), and may  
5  
6 remove/damage the SUS muscle<sup>16</sup> or its innervation<sup>17</sup>. Surgery may also affect the smooth  
7  
8 muscle of the bladder neck<sup>17</sup>, as well as bladder contractility<sup>18</sup> and compliance<sup>16</sup>, contributing  
9  
10 to overactivity of the detrusor muscle<sup>16 18</sup>. Recovery of continence after prostatectomy is  
11  
12 likely to require: enhanced function of SUS (and other striated muscles) to compensate for  
13  
14 the reduced smooth muscle (which would require capacity for low intensity sustained  
15  
16 contraction in addition to strong contraction); compensation by the PR and BC if SUS is  
17  
18 affected by surgery; and training of the bladder to hold volume. Recent work has highlighted  
19  
20 that persistent PPI is associate with impaired shortening of the SUS and BC, and descent  
21  
22 rather than elevation of the bladder neck (explained by failure of PR to prevent depression  
23  
24 from excessive abdominal pressure) during voluntary activation, but this varies between  
25  
26 men<sup>10</sup>. Digital rectal examination used for assessment and feedback in most previous trials of  
27  
28 PFMT for incontinence after prostatectomy<sup>19</sup> provides information of anal sphincter and PR  
29  
30 contraction, but cannot provide information of the SUS and BC. Transperineal ultrasound  
31  
32 imaging provides a non-invasive and validated<sup>20</sup> method to evaluate and provide feedback of  
33  
34 PR, SUS and BC, simultaneously.  
35  
36  
37  
38  
39  
40  
41

42 Supported by this physiological evidence and pilot clinical data, we predict that by  
43  
44 implementation of a PFMT program that targets the muscles that control urethral pressure  
45  
46 (particularly SUS) and compensates for tissues removed during surgery, in a manner that  
47  
48 matches the individual needs of each man, and trains incorporation of pelvic floor muscle  
49  
50 activation into functional tasks (rather than a training program limited to repeated maximal  
51  
52 voluntary contractions), we can achieve superior outcomes with substantial impact on quality  
53  
54 of life after prostatectomy.  
55  
56  
57  
58  
59  
60



## Aim

In this trial we aim to:

1. Determine whether PFMT that involves individualised functional training of neuromuscular (NM) control of striated muscles that constrict the urethra (*Urethral training*) achieves more rapid continence recovery after radical prostatectomy than a PFMT program that involves brief strong contractions of muscles around the anus that are not specific for urinary continence (*Conventional training*) or *No training*.
2. Test whether the quality of NM control of striated muscles that constrict the urethra at baseline (prior to surgery) moderates the relative efficacy of *Urethral training* compared to *Conventional training* or *No training*.
3. Determine whether change in NM control of striated muscles that constrict the urethra mediates the recovery of urinary continence.
4. Compare the cost effectiveness of the training programs.

## Methods and analysis

### Study design

This manuscript describes a research protocol for the “personalised pelvic floor Muscle Training for Urinary incontinence after Prostatectomy” (MaTchUP) randomised controlled trial. This study is a prospectively registered, randomised controlled trial. Participants will be randomised into either *Urethral training*, *Conventional training* or *No training*. This protocol has been developed in accordance with SPIRIT (Standard Protocol Items: Recommendations for Interventional Trials)<sup>21</sup>.

## Participant recruitment

Men scheduled to undergo radical prostatectomy (open or robotic) for prostate cancer at the Wesley and Princess Alexandra Hospitals (Brisbane, Queensland) will be invited to participate via an information pamphlet provided by administrative staff during a pre-surgical consultation with their treating urologist.

## Participants

To be eligible, participants must meet the following criteria:

### Inclusion criteria:

- Scheduled to undergo radical prostatectomy for prostate cancer,
- 30–70 years of age,
- Able to attend assessment/rehabilitation sessions in Brisbane,
- Able to understand English.

### Exclusion criteria:

- Urinary incontinence prior to surgery,
- Previous prostate surgery,
- Assessment/training of the pelvic floor muscles in the preceding 6 months,
- Scheduled to undergo or had previously undergone radiation therapy for prostate cancer.

## Study Treatments

Volunteers will be screened via an on-line form and phone interview and then scheduled to undergo a baseline assessment in the laboratory 1-2 weeks prior to surgery.

After baseline assessment, participants will be randomised into one of three groups:

*Conventional training, Urethral training or No training.*

Randomisation will be in permuted blocks of size 4-8, stratified by surgeon and baseline NM control of striated muscles that constrict the urethra with patients dichotomised

1  
2  
3 as good [or poor] by ability to achieve both  $\geq 4.1$  mm of SUS displacement and  $\geq 2.4$  mm of  
4 PR displacement as assessed with transperineal ultrasound imaging (see below; Stafford et  
5 al., 2018 unpublished data). Group allocation will be determined using an automatic  
6 randomisation schedule developed by an independent statistician and integrated into the  
7 REDCap data administration system (see below) to ensure concealed allocation.  
8  
9  
10  
11  
12  
13  
14  
15  
16  
17  
18  
19  
20  
21  
22  
23  
24  
25  
26  
27  
28  
29  
30  
31  
32  
33  
34  
35  
36  
37  
38  
39  
40  
41  
42  
43  
44  
45  
46  
47  
48  
49  
50  
51  
52  
53  
54  
55  
56  
57  
58  
59  
60

Participants randomly allocated to the groups receiving treatment will attend up to 10 treatment sessions supervised by a physiotherapist. All participants will attend an initial session 1-2 weeks before surgery (after the baseline assessment). At this session, participants in the *No training* group will undergo no assessment or training and will not attend further sessions. Participants allocated to one of the two treatment groups will be assessed by the physiotherapist at the pre-operative session according to their allocated exercise program and taught the initial training exercise to commence prior to surgery. After surgery, participants in the exercise groups will attend up to 9 sessions, 1 week apart, commencing after catheter removal (~2 weeks post-surgery) and continued until continence is achieved (using the definition below) or until 10 sessions have been utilised. Exercise programs will be documented according to the Consensus on Exercise Reporting Template (CERT) guidelines<sup>22</sup> which has been adapted specifically for recording PFMT programs by Hall et al.<sup>23</sup>.

### *Conventional training*

The Conventional PFMT is focused on repeated maximal contraction of the muscles around the anus and follows the principles of the program<sup>13</sup> used in the largest previous RCT for men with PPI<sup>24</sup>. Training commences with an assessment of muscle activation (digital rectal examination or anal surface electromyography (EMG)). Participants perform 3-s maximal contractions in lying, sitting and standing, two times per day, and also before activities such as coughing, lifting, rising from sitting. Daily home exercise are encouraged

1  
2  
3 and monitored by a physiotherapist. Training progresses by increasing the duration of  
4  
5 contractions, up to 10 s.  
6

### 7 *Urethral training*

8  
9  
10 Urethral training is an individualised PFMT program focused on the striated pelvic  
11  
12 floor muscles that constrict the urethra (SUS, PR, BC) with progression according to a  
13  
14 decision tool developed with a Clinical Advisory Committee. Exercise relies on the principles  
15  
16 of motor learning, skill training and exercise physiology. Training uses transperineal  
17  
18 ultrasound imaging for assessment of pelvic floor muscle activation during voluntary  
19  
20 contraction, coughing and a 60-s maximal contraction<sup>11 15 20</sup> to guide treatment tailoring.  
21  
22 Transperineal ultrasound imaging is also used for biofeedback at each physiotherapy session.  
23  
24 Urethral training commences with skill acquisition of the optimal pattern of pelvic floor  
25  
26 muscle activation to increase urethral pressure and avoidance of excessive abdominal muscle  
27  
28 contraction. Initial training focusses on SUS, but with tailoring to include the other muscles,  
29  
30 based on the assessment. Progression includes: training for activation of pelvic floor muscles  
31  
32 in functional tasks; bladder training to increase holding capacity; sustained holding to  
33  
34 enhance adaptation of striated muscles to provide ongoing maintenance of continence;  
35  
36 training of ballistic efforts for episodes of increased bladder pressure (lifting, coughing, etc);  
37  
38 and high-performance training including strength training to prepare for demanding tasks.  
39  
40 Daily home exercise to practice tasks taught in each session will be encouraged and  
41  
42 monitored by a physiotherapist.  
43  
44  
45  
46  
47  
48

### 49 *No training*

50  
51 Participants allocated to *No training* will attend a pre-operative session with a  
52  
53 physiotherapist during which they will receive standard written education material (similar to  
54  
55 the online-resources readily available from prostate cancer support groups) and education  
56  
57 about how to perform the outcome measures.  
58  
59  
60

1  
2  
3 Participants in all groups will be requested to refrain from seeking additional  
4 treatment until the primary end-point at 3 months. Any treatment sought by participants will  
5 be recorded.  
6  
7  
8  
9

10 Physiotherapists will be trained to apply one treatment only. They will have prior  
11 experience with management of incontinence and will undergo sufficient training to ensure  
12 competence. Therapists providing *Urethral training* will receive comprehensive training in  
13 transperineal ultrasound imaging. Competence of therapists will be formally assessed and  
14 treatment fidelity evaluated by observation during a subset of sessions by a researcher to  
15 document adherence to the protocol.  
16  
17  
18  
19  
20  
21  
22

### 23 Data collection

24 All data will be collected online using REDCap (Research Electronic Data Capture).  
25  
26 Participants will complete an online questionnaire at baseline to provide demographic data  
27 including date of birth, height, weight, employment status, marital status, education level,  
28 smoker status and comorbidities. Prostate volume, Gleason score, surgery date, surgery type,  
29 surgery complications, date of catheter removal, and adjunct treatments will also be recorded.  
30  
31 Primary and secondary data (except neuromuscular control measures) will be recorded with  
32 the online system according to the schedule outlined in Table 1. The primary endpoint at 3  
33 months was selected as qualitative research highlights that rapid/complete recovery of  
34 continence is a priority for men<sup>25</sup> as long periods of incontinence have a major impact on  
35 quality-of-life<sup>26</sup>, and it was considered unethical to withhold treatment from men allocated to  
36 *No training* for more than 3 months if they continue to experience incontinence.  
37  
38  
39  
40  
41  
42  
43  
44  
45  
46  
47  
48  
49  
50  
51  
52  
53  
54  
55  
56  
57  
58  
59  
60

**Table 1:** Data collection timeline

|                               | Enrolment | Baseline         | Allocation | Post-Allocation |                  |         |                        |           |
|-------------------------------|-----------|------------------|------------|-----------------|------------------|---------|------------------------|-----------|
| Time point                    |           | 1-2 weeks pre-op |            | ~1 week pre-op  | ~2 weeks post-op | 6 weeks | 3 months               | 12 months |
| Enrolment:                    |           |                  |            |                 |                  |         |                        |           |
| Eligibility screen            | X         |                  |            |                 |                  |         |                        |           |
| Informed consent              | X         |                  |            |                 |                  |         |                        |           |
| Randomisation                 |           |                  | X          |                 |                  |         |                        |           |
| Interventions:                |           |                  |            |                 |                  |         |                        |           |
| Urethral training             |           |                  |            |                 |                  |         |                        |           |
| Conventional training         |           |                  |            |                 |                  |         |                        |           |
| No training                   |           |                  |            | X               |                  |         |                        |           |
| Assessments:                  |           |                  |            |                 |                  |         |                        |           |
| 24-hour pad weight test *     |           | X                |            |                 |                  |         | X<br>(primary outcome) | X         |
| NM control measure            |           | X                |            |                 | X                | X       | X                      | X         |
| ICS-male SF *                 |           | X                |            |                 |                  |         | X                      | X         |
| IPAQ *                        |           | X                |            |                 |                  |         | X                      | X         |
| SF-12 (weekly)                |           | X                |            |                 |                  |         | X                      | X         |
| EQ-5D-5L (weekly)             |           | X                |            |                 |                  |         | X                      | X         |
| Incontinence-related costs *  |           | X                |            |                 |                  |         | X                      | X         |
| Sexual function (weekly)      |           | X                |            |                 |                  |         | X                      | X         |
| Bowel function (weekly)       |           | X                |            |                 |                  |         | X                      | X         |
| Treatment adherence (monthly) |           |                  |            |                 |                  |         | X                      | X         |

NM = neuromuscular; ICS-male SF = International Continence Society Male Short Form; SF-12 = 12-item Short Form Survey; EQ-5D-5L = 5 level EuroQol 5 dimension, IPAQ = International Physical Activity Questionnaire; \* = weekly to primary end-point at 3 months, then monthly to 12 months

For secondary outcome measures of NM control, participants will attend laboratory sessions at baseline (prior to randomisation for identification of NM control parameters used for stratification and as moderator of treatment efficacy), ~2 weeks post-op after catheter removal (for secondary analysis of post-op NM control as a moderator of treatment efficacy), 6 weeks (for intermediate measurement of NM control to judge improvement in NM control

1  
2  
3 as a potential causal mediator of outcome) and 12 months (for secondary analysis of long-  
4 term outcome of intervention) (Table 1).  
5  
6

7  
8 Secondary outcomes (continence [continence questionnaire and 24-hour pad test],  
9 physical activity, quality of life, incontinence-related costs, and sexual function and bowel  
10 function) will be entered into the online data management system weekly until the primary  
11 end point at 3 months. All secondary outcomes will also be collected at 12 months. All men  
12 will continue to complete the continence [continence questionnaire and 24-hour pad test],  
13 physical activity, and incontinence-related costs data monthly until 12 months. Men will be  
14 prompted to complete this information via their preferred method (SMS, telephone or e-mail).  
15  
16  
17  
18  
19  
20  
21  
22  
23

#### 24 Treatment adherence

25  
26 Adherence to exercise will be encouraged by the treating physiotherapist and  
27 monitored using an online questionnaire. Physiotherapists will be trained to promote  
28 adherence to the program using principles of behaviour change including identification of  
29 barriers, cognitive analysis, prioritisation and action planning. Participants will be prompted  
30 monthly via their preferred method (SMS, telephone or e-mail) to input data of home exercise  
31 performance. This was selected rather than weekly measurement to avoid excessive  
32 prompting of the *No treatment* group.  
33  
34  
35  
36  
37  
38  
39  
40  
41

#### 42 Blinding

43  
44 Assessors and statisticians will be blinded to group allocation. It will not be possible  
45 to blind the participant or treating therapist to the treatment, but patients will be blinded to the  
46 hypotheses or details of treatments applied to other groups. Prior to randomisation  
47 participants will be informed that systematic reviews show uncertain evidence of benefit from  
48 PFMT (note that all men, including the *No treatment* group, will receive written information  
49 about PFMT).  
50  
51  
52  
53  
54  
55  
56  
57  
58  
59  
60

## Outcome measures

### *Primary Outcome*

The primary outcome measure will be the 24-hour pad weight test. It will be assessed at baseline and 3 months. Continence is defined as a loss of <2g of urine<sup>8</sup>. The day before laboratory testing, the SMS service will remind men to pre-weigh and retain all pads used for the next 24 hours in sealed plastic bags and weigh them using provided scales. Data will be provided to the research staff at the laboratory session. The dichotomous classification of continence will be the primary outcome.

### *Secondary outcomes*

Ultrasound measures of NM control of urethral pressure: NM control of pelvic floor muscles will be assessed at baseline, post-surgery, 6 weeks, 3 months and 12 months during: (i) voluntary contraction of pelvic floor muscles; (ii) cough according to a protocol described by Stafford et al.<sup>11</sup>; (iii) maximal voluntary contraction sustained for 60 s, and (iv) repeated contractions. These measures have been validated as measure of activation of the individual pelvic floor muscles<sup>20</sup>.

Other secondary outcomes that will be measured as outlined in Table 1 are;

- (i) International Continence Society Male Short Form (incontinence subscale) (ICS-male SF): Measures the symptomatology and “bothersomeness” of incontinence for men with prostatic disease.
- (ii) Self-assessed 24-hour pad test: So that the test can be completed at home, men will be provided with a digital scale to weigh all pads used in a 24-hour period. The start and end of the test will be prompted using the SMS service and a bladder diary will be collected for this period. The measure of pad weight (grams) is recorded as the secondary outcome.



- 1  
2  
3  
4  
5  
6  
7  
8  
9  
10  
11  
12  
13  
14  
15  
16  
17  
18  
19  
20  
21  
22  
23  
24  
25  
26  
27  
28  
29  
30  
31  
32  
33  
34  
35  
36  
37  
38  
39  
40  
41  
42  
43  
44
- (iii) International Physical Activity Questionnaire (IPAQ): Used to assess physical activity over the same period as the 24-hour pad weight test.
  - (iv) 12-Item Short Form Survey (SF-12)<sup>27</sup>: Used to measure health-related quality of life based on recommendations of a recent systematic review of quality-of-life measures for prostate cancer<sup>28</sup>. The SF-6D computation may also be applied to SF-12 data to compute the utility weights required to construct Quality-Adjusted Life-Year (QALY) measures for use in the cost-effectiveness analysis.
  - (v) EQ-5D-5L<sup>29</sup>: Used to calculate the QALY saved for cost-effectiveness analysis.
  - (vi) Incontinence-related costs (use of health services/devices): Recorded prospectively for every participant for 12 months. Men will be prompted to input data using the data collection system. Data will include visits to health care practitioners (e.g. therapists, GP), drugs, and number of devices such as pads or bed/chair protectors used.
  - (vii) Sexual function: Determined using the question "Are you currently able to achieve a full erection?".
  - (viii) Bowel function: Determined using questions previously described in a clinical trial of post-prostatectomy incontinence<sup>30</sup>.

#### 45 Data Integrity

46 All data will be directly collected into the REDCap Electronic Data Capture program.  
47  
48 Any inconsistencies in the data will be explored and resolved. The database will be backed-  
49  
50 up regularly on a secure network and be compliant to the ICH Guideline for Good Clinical  
51  
52 Practice<sup>31</sup>, according to our Data Management Plan. Study personnel will only be able to  
53  
54 access the database with a personal login and password.  
55  
56  
57  
58  
59  
60

## Retention of documents

Study investigators will maintain adequate and accurate records to enable the conduct of the study to be fully documented and the study data to be subsequently verified. After completion of the study, study data will be archived by The University of Queensland for a minimum of 15 years.

## Data analysis

### *Primary endpoint and sample size justification*

The primary outcome is the proportion of participants continent at 3 months. This study is powered to determine whether the *Urethral training* is more efficacious than *Conventional training*. This difference is expected to be smaller than the difference between *Urethral* and *No training*. Data from seven RCTs (see <sup>32</sup>) indicate ~60% of men receiving *Conventional training* will be incontinent at 3 months. With 97 men per group, a reduction of incontinence by a third, from 60% to 40% of men at 3 months (conservatively based on the difference identified in a previous study <sup>8</sup>, which included some features we consider critical in the proposed program) can be detected with 80% power and a two-sided significance level of 0.05

Our data of healthy men suggest ~55% have good baseline NM control (Stafford et al., 2018 unpublished data), defined as ability to achieve both  $\geq 4.1$  mm of SUS displacement and  $\geq 2.4$  mm of PR displacement as assessed with transperineal ultrasound imaging during voluntary contraction (Stafford et al., 2018 unpublished data). We make the assumption that among those with good baseline NM control, incontinence outcomes at 3 months will be similar regardless of treatment arm. With these assumptions and sample size, we have 88% power to detect a significant interaction between baseline NM control and treatment arm if we assume that 70% of men with good baseline NM control will be continent at 3 months regardless of treatment, but that, of the men with poor baseline NM control, 90% and 50%

1  
2  
3 will be continent with *Urethral* or *Conventional training*, respectively. We will recruit 121  
4  
5 men per arm (adjusting for a potential drop-out rate of 20%). This is feasible based on a  
6  
7 recent RCT of 308 participants<sup>6</sup> from a subset of our referral sources.  
8  
9

### 10 *Statistical analysis*

11  
12 A biostatistician (JK) will analyse blinded data, with all patients enrolled and  
13  
14 randomised to treatment/no treatment arms comprising the data set for analysis. Baseline  
15  
16 characteristics of groups will be tabulated using summary statistics. If required, multiple  
17  
18 imputation will be used to account for missing data, with imputation conducted separately for  
19  
20 each treatment arm.  
21  
22

### 23 *Primary analysis*

24  
25  
26 Analyses will be by intention-to-treat of all randomised participants. For the binary  
27  
28 continence outcome at each time point, a hierarchical logistic regression model including  
29  
30 random effects for physiotherapists, terms for treatment group and baseline control and an  
31  
32 interaction between them will be fit. The model will also include a term for the stratifying  
33  
34 variable of surgeon. For the primary hypothesis, this model will be interrogated to yield  
35  
36 differences in the proportions of participants recovering continence at 3 months between the  
37  
38 groups and 95% confidence intervals<sup>33</sup>. The model will be similarly interrogated to determine  
39  
40 whether the effect of *Urethral training* relative to *Conventional training* is moderated by NM  
41  
42 control at baseline. A secondary analysis will fit a longitudinal model for the multiple  
43  
44 outcomes from each participant, including random effects for each participant as well as for  
45  
46 physiotherapist, and a three-way interaction term between time, randomised treatment group,  
47  
48 and baseline NM control, and all 2-way interactions and main effects, as well as a term for  
49  
50 surgeon.  
51  
52  
53  
54

### 55 *Secondary analyses*

1  
2  
3 The continuous measure of continence (24-hour pad test – pad weight) and other  
4 continuous outcomes (ICS-male SF, SF12, EQ-5D-5L, sexual function, and bowel function)  
5 will be compared between groups by fitting similar random effects linear regression models.  
6  
7 Time to recovery of continence will be compared between groups using a Cox proportional  
8 hazards model using the weekly self-assessed pad test. Model assumptions (linearity,  
9 normality and homoscedasticity of residuals for the linear regression models, and  
10 proportional hazards) will be assessed using standard diagnostic plots.  
11  
12  
13  
14  
15  
16  
17  
18

19 **Mediation analysis:** To determine the extent to which the effect of *Urethral training* on the  
20 primary outcome and on the continuous measurement of continence is mediated through an  
21 improvement in NM control, as hypothesised, we will apply a causal mediation analysis<sup>34</sup>.  
22  
23 Mediation analyses will be conducted treating the 6-week and 3-month NM control measures  
24 as the potential mediators, with all analyses adjusted for baseline NM control and other  
25 potential confounders of the outcome-mediator relationship (e.g. prostate volume, Gleason  
26 score, age, etc.). The analysis will be conducted in two stages: at the first stage, the effect of  
27 randomisation to the study arms on NM control measures will be assessed. In the second  
28 stage, models will be fit to estimate the direct effect of randomised group on outcome and the  
29 indirect effect of randomised group on the outcome that acts through the putative mediator.  
30  
31 Whether the indirect effect of treatment on the outcomes changes depending on the level of  
32 NM control achieved after surgery will be investigated through the inclusion of interaction  
33 terms between treatment group and post-surgery NM control variables in the mediation  
34 analyses.  
35  
36  
37  
38  
39  
40  
41  
42  
43  
44  
45  
46  
47  
48  
49  
50

51 If significant mediation is found, logistic regression will be undertaken using the 3-  
52 month data of the NM control variables to determine which variables are best linked with  
53 continence. A factor analysis across all participants will be applied to extract common NM  
54 control features from the NM control variables. NM control features will then be used as  
55  
56  
57  
58  
59  
60

1  
2  
3 predictor variables in the logistic regression analysis to assess the relative contribution of  
4  
5 each to the odds of regaining continence.  
6  
7

8 **Cost effectiveness analysis:** Costs of services and devices will be estimated using market  
9  
10 prices. We will undertake two analyses. First, we will compare cost-effectiveness between  
11  
12 treatment arms (3- and 12-month data). Second, we will address the question of whether  
13  
14 treatment is more cost-effective if only offered to men with poor NM control at baseline. For  
15  
16 this analysis we will test the interaction between treatment arm and baseline NM control.  
17  
18 This will test the hypothesis that continence-related costs will be similar for men with good  
19  
20 NM control, regardless of treatment allocation, but costs will be significantly less for men  
21  
22 with poor baseline NM control allocated to *Urethral training*. Quality-adjusted life-years  
23  
24 saved (QALYs) will be computed using the EQ-5D-5L data and SF-12 data, using an SF6D  
25  
26 algorithm. Cost-effectiveness ratios will be computed and n-way sensitivity analyses will be  
27  
28 conducted to produce cost-effectiveness acceptability curves for relevant sets of assumptions  
29  
30 about costs and outcomes.  
31  
32  
33

### 34 *Contamination between groups*

35  
36  
37 We do not anticipate contamination between *Urethral training* and *Conventional*  
38  
39 *training* as different therapists will apply each intervention. Further, ultrasound imaging is  
40  
41 required for the *Urethral training* and is not available to the other groups. It is possible that  
42  
43 men allocated to *No treatment* will be exposed to information regarding PFMT (in addition to  
44  
45 that provided to them in written form at the pre-surgery visit to the physiotherapist) through  
46  
47 searching the internet and from friends and family. However, evidence from several trials  
48  
49 shows that provision of information alone does not lead to clinical improvement<sup>32</sup>.  
50  
51  
52  
53

### 54 *Ethics and dissemination*

55  
56  
57 This study is supported by grants from the National Health and Medical Research  
58  
59 Council of Australia and Queensland Health, is registered with the Australian New Zealand  
60

Clinical Trials Registry, and has ethical approval from the Human Research Ethics Committees of The University of Queensland (2017001736), Uniting Care (UCHHREC1739), and Metro South (HREC/17/QPAH/591)(Table 2). The funders have not contributed to the design of the trial, nor will they be involved in its conduct or management. The current protocol is version 2 (2<sup>nd</sup> May 2018) and any future protocol modifications would require approval by the principal investigator (PWH) and formal amendment.

**Table 2:** Trial registration data

| Data category                                 | Information                                                                                                                                   |
|-----------------------------------------------|-----------------------------------------------------------------------------------------------------------------------------------------------|
| Primary registry and trial identifying number | Australia New Zealand Clinical Trials Registry<br>[ACTRN12617000788370]                                                                       |
| Date of registration in primary registry      | 30/05/2017                                                                                                                                    |
| Secondary identifying numbers                 | Universal Trial Number U1111-1196-7696                                                                                                        |
| Sources of monetary or material support       | Sponsors (below)                                                                                                                              |
| Primary sponsor                               | National Health and Medical Research Council -<br>Research Committee Secretariat NHMRC, GPO<br>Box 1421, Canberra, ACT 2601                   |
| Secondary sponsor                             | Queensland Health Physiotherapy Research<br>Fellowship - Queensland Health Building<br>147-163 Charlotte Street, Brisbane, Queensland<br>4000 |
| Contact for public queries                    | RS (r.stafford@uq.edu.au)                                                                                                                     |
| Contact for scientific queries                | RS (r.stafford @uq.edu.au)                                                                                                                    |

|                                      |                                                                                                                                                                                                                                                           |
|--------------------------------------|-----------------------------------------------------------------------------------------------------------------------------------------------------------------------------------------------------------------------------------------------------------|
| Public title                         | Personalised pelvic floor Muscle Training for Urinary incontinence after Prostatectomy                                                                                                                                                                    |
| Scientific title                     | Efficacy of a personalised pelvic floor Muscle Training program on Urinary incontinence after radical Prostatectomy: A randomised clinical trial with embedded physiological studies                                                                      |
| Countries of recruitment             | Australia                                                                                                                                                                                                                                                 |
| Health condition or problem studied  | Post-prostatectomy incontinence                                                                                                                                                                                                                           |
| Intervention                         | Urethral muscle training - comprehensive individualized program focused on training the striated muscles that pressurise the urethra.                                                                                                                     |
| Key inclusion and exclusion criteria | Inclusion criteria: aged 30 to 70 years; scheduled to undergo radical prostatectomy for prostate cancer; able to attend assessment and treatment sessions; able to understand English                                                                     |
|                                      | Exclusion criteria: urinary incontinence prior to surgery; previous prostate/urethral surgery; assessment/training of pelvic floor muscles in preceding 6 months; scheduled to undergo or had previously undergone radiation therapy for prostate cancer. |
| Study type                           | Randomised controlled trial, assessor and statistician blinding, automatic independent randomisation                                                                                                                                                      |
| Date of first enrolment              | 27/07/2018                                                                                                                                                                                                                                                |

|                        |                                                                                                                                                                                                                                                                                                                                      |
|------------------------|--------------------------------------------------------------------------------------------------------------------------------------------------------------------------------------------------------------------------------------------------------------------------------------------------------------------------------------|
| Target sample size     | 363                                                                                                                                                                                                                                                                                                                                  |
| Recruitment status     | Recruiting                                                                                                                                                                                                                                                                                                                           |
| Primary outcome(s)     | Continence defined by the 24-hour pad weight test                                                                                                                                                                                                                                                                                    |
| Key secondary outcomes | 12-Item Short Form Survey (SF-12); International Continence Society Male Short Form Questionnaire; Continence-related costs; 24-hour pad test; Measures of neuro-muscular control of urethral pressure; International Physical Activity Questionnaire (IPAQ); EQ-5D-5L questionnaire; Questions related to sexual and bowel function |

Potential participants will be invited to participate via their treating urologist. To manage this unequal relationship, potential participants will be informed that trial assessments and interventions are not part of their routine care, that they are free to decide to participate without coercion, and that the decision to not participate will not influence their management or relationship with their urologist. Although the urologist may discuss the trial with the patient, they will not be involved in the screening or consent process, nor any of the assessment or training sessions.

As standard practice at the Princess Alexandra Hospital involves provision of written information only, no treatment will be withheld from patients. If a patient continues to experience incontinence at the completion of the primary endpoint we will provide them with information of treatment options.

Participants will be given contact details of the project manager for queries or concerns. As all treatments are low risk no adverse events are anticipated, but if any do occur they will be recorded and reported. Records of complaints arising from the trial will be acted



1  
2  
3 upon in accordance with institutional policy. Participants will be informed they are free to  
4  
5 withdraw from the study at any time. They will be given the option to receive the results of  
6  
7 the study in summary format at the conclusion of the trial.  
8  
9

10 Participant data sheets will be stored in a locked cabinet, in addition to electronic  
11  
12 storage of scanned copies on the secure institutional data server. All other data will be stored  
13  
14 in electronic format in a de-identified manner. Consent forms (that include both a code and  
15  
16 identifiable information) will be stored separately to the coded data in a locked cabinet.  
17  
18 The data collected in this trial will be thoroughly analysed and published. As this data will be  
19  
20 specific to the interventions provided, we do not anticipate any secondary use of the  
21  
22 information. The trial consent form includes the option to opt out of making data available for  
23  
24 future analyses.  
25  
26  
27

28 The results will be disseminated through publication in peer-reviewed scientific  
29  
30 journals and presented at major international scientific meetings. Further, the study outcomes  
31  
32 will be disseminated to the broader community through paper-based and online media.  
33  
34  
35

### 36 Patient and Public Involvement

37  
38

39 The research question was based on hypotheses developed from basic science data,  
40  
41 and informed by the poor results reported from previous randomised controlled trials, but did  
42  
43 not involve direct patient or public involvement. The primary outcome measure was based on  
44  
45 published data of patients' preferences. Patients did not contribute to the design of this study.  
46  
47 Patients were not involved in the recruitment to or conduct of the study. The results will be  
48  
49 disseminated to study participants in the form of a summary (written in lay language) at the  
50  
51 completion of the trial. The acceptability of the nature and burden of the intervention was  
52  
53 confirmed by application of the treatment protocol in pilot trials with patients prior to  
54  
55 commencement of the study.  
56  
57  
58  
59  
60

## Authors' contributions

PH, RS, GC, JAM, AC and LH conceived the study. PH, RS, GC, JK, JAM, AC, LC and LH developed the experimental design for the study. JK designed the statistical analysis of the study and undertook power calculation. LC designed the health economic data collection and analysis. PH, RS, GC, JAM, AC and LC obtained funding for the study. All authors contributed to preparation of the protocol manuscript and all authors approved the final version.

## Funding statement

This clinical trial is supported by the National Health and Medical Research Council (NHMRC) of Australia (APP1146267) and a Queensland Health Physiotherapy Research Fellowship grant. PH is supported by a NHMRC Senior Principal Research Fellowship (APP1102905).

## Competing interests statement

No authors have any competing interests to declare.

## References

1. AIHW. Cancer in Australia 2017. Cancer series no101. Canberra: AIHW, 2017.
2. Litwin MS, Melmed GY, Nakazon T. Life after radical prostatectomy: a longitudinal study. *J Urol* 2001;166(2):587-92.
3. Kao TC, Cruess DF, Garner D, et al. Multicenter patient self-reporting questionnaire on impotence, incontinence and stricture after radical prostatectomy. *J Urol* 2000;163(3):858-64.
4. Fowler FJ, Jr., Barry MJ, Lu-Yao G, et al. Effect of radical prostatectomy for prostate cancer on patient quality of life: results from a Medicare survey. *Urol* 1995;45(6):1007-13.
5. Katz G, Rodriguez R. Changes in continence and health-related quality of life after curative treatment and watchful waiting of prostate cancer. *Urol* 2007;69(6):1157-60.
6. Yaxley JW, Coughlin GD, Chambers SK, et al. Robot-assisted laparoscopic prostatectomy versus open radical retropubic prostatectomy: early outcomes from a randomised controlled phase 3 study. *Lancet* 2016;388(10049):1057-66.
7. Dumoulin C, Hay-Smith J. Pelvic floor muscle training versus no treatment, or inactive control treatments, for urinary incontinence in women. *Cochrane Database Syst Rev* 2010(1):CD005654.
8. Van Kampen M, De Weerd W, Van Poppel H, et al. Effect of pelvic-floor re-education on duration and degree of incontinence after radical prostatectomy: a randomised controlled trial. *Lancet* 2000;355(9198):98-102.
9. Campbell SE, Glazener CM, Hunter KF, et al. Conservative management for postprostatectomy urinary incontinence. *Cochrane Database Syst Rev* 2012;1:CD001843.

- 1  
2  
3 10. Stafford RE, Ashton-Miller JA, Constantinou CE, et al. A new method to quantify male  
4 pelvic floor displacement from 2D transperineal ultrasound images. *Urol*  
5  
6 2013;81(3):685-9.  
7  
8  
9
- 10 11. Stafford RE, van den Hoorn W, Coughlin G, et al. Postprostatectomy incontinence is  
11 related to pelvic floor displacements observed with trans-perineal ultrasound imaging.  
12  
13 *Neurourol Urodyn* 2018;37(2):658-65.  
14  
15  
16
- 17 12. Stafford RE, Sapsford R, Ashton-Miller J, et al. A novel transurethral surface electrode to  
18 record male striated urethral sphincter electromyographic activity. *J Urol*  
19  
20 2010;183(1):378-85.  
21  
22  
23
- 24 13. Dorey G, Glazener C, Buckley B, et al. Developing a pelvic floor muscle training  
25 regimen for use in a trial intervention. *Physiother* 2009;95(3):199-209.  
26  
27  
28
- 29 14. Stafford RE, Ashton-Miller JA, Constantinou CE, et al. Novel insight into the dynamics  
30 of male pelvic floor contractions through transperineal ultrasound imaging. *J Urol*  
31  
32 2012;188(4):1224-30. doi: 10.1016/j.juro.2012.06.028  
33  
34  
35
- 36 15. Stafford RE, Mazzone S, Ashton-Miller JA, et al. Dynamics of male pelvic floor muscle  
37 contraction observed with transperineal ultrasound imaging differ between voluntary  
38 and evoked coughs. *J Appl Physiol* 2014;116(8):953-60.  
39  
40  
41
- 42 16. Desautel MG, Kapoor R, Badlani GH. Sphincteric incontinence: the primary cause of  
43 post-prostatectomy incontinence in patients with prostate cancer. *Neurourol Urodyn*  
44  
45 1997;16(3):153-60.  
46  
47  
48
- 49 17. Presti JC, Jr., Schmidt RA, Narayan PA, et al. Pathophysiology of urinary incontinence  
50 after radical prostatectomy. *J Urol* 1990;143(5):975-8.  
51  
52  
53
- 54 18. Groutz A, Blaivas JG, Chaikin DC, et al. The pathophysiology of post-radical  
55 prostatectomy incontinence: a clinical and video urodynamic study. *J Urol*  
56  
57 2000;163(6):1767-70.  
58  
59  
60

- 1  
2  
3 19. Hall LM, Aljuraifani R, Hodges PW. Design of programs to train pelvic floor muscles in  
4  
5 men with urinary dysfunction: Systematic review. *Neurourol Urodyn*  
6  
7 2018;37(7):2053-87.  
8  
9
- 10 20. Stafford RE, Coughlin G, Lutton NJ, et al. Validity of Estimation of Pelvic Floor Muscle  
11  
12 Activity from Transperineal Ultrasound Imaging in Men. *PLoS One*  
13  
14 2015;10(12):e0144342.  
15  
16
- 17 21. Chan AW, Tetzlaff JM, Altman DG, et al. SPIRIT 2013 statement: defining standard  
18  
19 protocol items for clinical trials. *Ann Intern Med* 2013;158(3):200-7.  
20  
21
- 22 22. Slade SC, Dionne CE, Underwood M, et al. Consensus on Exercise Reporting Template  
23  
24 (CERT): Explanation and Elaboration Statement. *Br J Sports Med* 2016;50(23):1428-  
25  
26 37.  
27  
28
- 29 23. Hall M, Hinman RS, Wrigley TV, et al. The effects of neuromuscular exercise on medial  
30  
31 knee joint load post-arthroscopic partial medial meniscectomy: 'SCOPEX' a  
32  
33 randomised control trial protocol. *BMC Musculoskelet Disord* 2012;13:233.  
34  
35
- 36 24. Glazener C, Boachie C, Buckley B, et al. Urinary incontinence in men after formal one-  
37  
38 to-one pelvic-floor muscle training following radical prostatectomy or transurethral  
39  
40 resection of the prostate (MAPS): two parallel randomised controlled trials. *Lancet*  
41  
42 2011;378(9788):328-37.  
43  
44
- 45 25. Cooperberg MR, Master VA, Carroll PR. Health related quality of life significance of  
46  
47 single pad urinary incontinence following radical prostatectomy. *J Urol* 2003;170(2  
48  
49 Pt 1):512-5.  
50  
51
- 52 26. Kirschner-Hermanns R, Jakse G. Quality of life following radical prostatectomy. *Crit Rev*  
53  
54 *Oncol/Hematol* 2002;43(2):141-51.  
55  
56
- 57 27. Ware J, Jr., Kosinski M, Keller SD. A 12-Item Short-Form Health Survey: construction of  
58  
59 scales and preliminary tests of reliability and validity. *Med Care* 1996;34(3):220-33.  
60

- 1  
2  
3 28. Hamoen EH, De Rooij M, Witjes JA, et al. Measuring health-related quality of life in  
4  
5 men with prostate cancer: A systematic review of the most used questionnaires and  
6  
7 their validity. *Urol Oncol* 2015;33(2):69 e19-28.  
8  
9
- 10 29. Herdman M, Gudex C, Lloyd A, et al. Development and preliminary testing of the new  
11  
12 five-level version of EQ-5D (EQ-5D-5L). *Qual Life Res* 2011;20(10):1727-36.  
13  
14
- 15 30. Glazener C, Boachie C, Buckley B, et al. Conservative treatment for urinary incontinence  
16  
17 in Men After Prostate Surgery (MAPS): two parallel randomised controlled trials.  
18  
19 *Health Technol Assess* 2011;15(24):1-290, iii-iv.  
20  
21
- 22 31. ICH. ICH Guideline for Good Clinical Practice, 2016.  
23
- 24 32. Anderson CA, Omar MI, Campbell SE, et al. Conservative management for  
25  
26 postprostatectomy urinary incontinence. *Cochrane Database Syst Rev*  
27  
28 2015;1:CD001843.  
29
- 30 33. Muller CJ, MacLehose RF. Estimating predicted probabilities from logistic regression:  
31  
32 different methods correspond to different target populations. *Int J Epidemiol*  
33  
34 2014;43(3):962-70.  
35  
36
- 37 34. Emsley R, Dunn G, White IR. Mediation and moderation of treatment effects in  
38  
39 randomised controlled trials of complex interventions. *Stat Method Med Res*  
40  
41 2010;19(3):237-70.  
42  
43  
44  
45  
46  
47  
48  
49  
50  
51  
52  
53  
54  
55  
56  
57  
58  
59  
60



SPIRIT 2013 Checklist: Recommended items to address in a clinical trial protocol and related documents\*

| Section/item                      | Item No | Description                                                                                                                                                                                                                                                                              | Addressed on page number |
|-----------------------------------|---------|------------------------------------------------------------------------------------------------------------------------------------------------------------------------------------------------------------------------------------------------------------------------------------------|--------------------------|
| <b>Administrative information</b> |         |                                                                                                                                                                                                                                                                                          |                          |
| Title                             | 1       | Descriptive title identifying the study design, population, interventions, and, if applicable, trial acronym                                                                                                                                                                             | ___ 1 ___                |
| Trial registration                | 2a      | Trial identifier and registry name. If not yet registered, name of intended registry                                                                                                                                                                                                     | ___ 2 ___                |
|                                   | 2b      | All items from the World Health Organization Trial Registration Data Set                                                                                                                                                                                                                 | ___ 19 ___               |
| Protocol version                  | 3       | Date and version identifier                                                                                                                                                                                                                                                              | ___ 19 ___               |
| Funding                           | 4       | Sources and types of financial, material, and other support                                                                                                                                                                                                                              | ___ 19, 22 ___           |
| Roles and responsibilities        | 5a      | Names, affiliations, and roles of protocol contributors                                                                                                                                                                                                                                  | ___ 1, 22 ___            |
|                                   | 5b      | Name and contact information for the trial sponsor                                                                                                                                                                                                                                       | ___ 19 ___               |
|                                   | 5c      | Role of study sponsor and funders, if any, in study design; collection, management, analysis, and interpretation of data; writing of the report; and the decision to submit the report for publication, including whether they will have ultimate authority over any of these activities | ___ 19 ___               |
|                                   | 5d      | Composition, roles, and responsibilities of the coordinating centre, steering committee, endpoint adjudication committee, data management team, and other individuals or groups overseeing the trial, if applicable (see Item 21a for data monitoring committee)                         | ___ N/A ___              |

|    |                                                           |     |                                                                                                               |               |
|----|-----------------------------------------------------------|-----|---------------------------------------------------------------------------------------------------------------|---------------|
| 1  | <b>Introduction</b>                                       |     |                                                                                                               |               |
| 2  |                                                           |     |                                                                                                               |               |
| 3  | Background and                                            | 6a  | Description of research question and justification for undertaking the trial, including summary of relevant   | ___ 4-5 ___   |
| 4  | rationale                                                 |     | studies (published and unpublished) examining benefits and harms for each intervention                        |               |
| 5  |                                                           |     |                                                                                                               |               |
| 6  |                                                           | 6b  | Explanation for choice of comparators                                                                         | ___ 4-5 ___   |
| 7  |                                                           |     |                                                                                                               |               |
| 8  | Objectives                                                | 7   | Specific objectives or hypotheses                                                                             | ___ 5-6 ___   |
| 9  |                                                           |     |                                                                                                               |               |
| 10 | Trial design                                              | 8   | Description of trial design including type of trial (eg, parallel group, crossover, factorial, single group), |               |
| 11 |                                                           |     | allocation ratio, and framework (eg, superiority, equivalence, noninferiority, exploratory)                   | ___ 6 ___     |
| 12 |                                                           |     |                                                                                                               |               |
| 13 |                                                           |     |                                                                                                               |               |
| 14 | <b>Methods: Participants, interventions, and outcomes</b> |     |                                                                                                               |               |
| 15 |                                                           |     |                                                                                                               |               |
| 16 | Study setting                                             | 9   | Description of study settings (eg, community clinic, academic hospital) and list of countries where data will | ___ 6 ___     |
| 17 |                                                           |     | be collected. Reference to where list of study sites can be obtained                                          |               |
| 18 |                                                           |     |                                                                                                               |               |
| 19 | Eligibility criteria                                      | 10  | Inclusion and exclusion criteria for participants. If applicable, eligibility criteria for study centres and  | ___ 6-7 ___   |
| 20 |                                                           |     | individuals who will perform the interventions (eg, surgeons, psychotherapists)                               |               |
| 21 |                                                           |     |                                                                                                               |               |
| 22 | Interventions                                             | 11a | Interventions for each group with sufficient detail to allow replication, including how and when they will be | ___ 8-9 ___   |
| 23 |                                                           |     | administered                                                                                                  |               |
| 24 |                                                           |     |                                                                                                               |               |
| 25 |                                                           | 11b | Criteria for discontinuing or modifying allocated interventions for a given trial participant (eg, drug dose  | ___ N/A ___   |
| 26 |                                                           |     | change in response to harms, participant request, or improving/worsening disease)                             |               |
| 27 |                                                           |     |                                                                                                               |               |
| 28 |                                                           | 11c | Strategies to improve adherence to intervention protocols, and any procedures for monitoring adherence        | ___ 12 ___    |
| 29 |                                                           |     | (eg, drug tablet return, laboratory tests)                                                                    |               |
| 30 |                                                           |     |                                                                                                               |               |
| 31 |                                                           | 11d | Relevant concomitant care and interventions that are permitted or prohibited during the trial                 | ___ 9 ___     |
| 32 |                                                           |     |                                                                                                               |               |
| 33 | Outcomes                                                  | 12  | Primary, secondary, and other outcomes, including the specific measurement variable (eg, systolic blood       | ___ 12-14 ___ |
| 34 |                                                           |     | pressure), analysis metric (eg, change from baseline, final value, time to event), method of aggregation (eg, |               |
| 35 |                                                           |     | median, proportion), and time point for each outcome. Explanation of the clinical relevance of chosen         |               |
| 36 |                                                           |     | efficacy and harm outcomes is strongly recommended                                                            |               |
| 37 |                                                           |     |                                                                                                               |               |
| 38 | Participant timeline                                      | 13  | Time schedule of enrolment, interventions (including any run-ins and washouts), assessments, and visits for   | ___ 11 ___    |
| 39 |                                                           |     | participants. A schematic diagram is highly recommended (see Figure)                                          |               |
| 40 |                                                           |     |                                                                                                               |               |
| 41 |                                                           |     |                                                                                                               |               |
| 42 |                                                           |     |                                                                                                               |               |
| 43 |                                                           |     |                                                                                                               |               |
| 44 |                                                           |     |                                                                                                               |               |
| 45 |                                                           |     |                                                                                                               |               |
| 46 |                                                           |     |                                                                                                               |               |



|    |                                                                     |     |                                                                                                                                                                                                                                                                                                                                                                                                              |                 |
|----|---------------------------------------------------------------------|-----|--------------------------------------------------------------------------------------------------------------------------------------------------------------------------------------------------------------------------------------------------------------------------------------------------------------------------------------------------------------------------------------------------------------|-----------------|
| 1  | Sample size                                                         | 14  | Estimated number of participants needed to achieve study objectives and how it was determined, including clinical and statistical assumptions supporting any sample size calculations                                                                                                                                                                                                                        | _____15_____    |
| 2  |                                                                     |     |                                                                                                                                                                                                                                                                                                                                                                                                              |                 |
| 3  |                                                                     |     |                                                                                                                                                                                                                                                                                                                                                                                                              |                 |
| 4  | Recruitment                                                         | 15  | Strategies for achieving adequate participant enrolment to reach target sample size                                                                                                                                                                                                                                                                                                                          | _____6_____     |
| 5  |                                                                     |     |                                                                                                                                                                                                                                                                                                                                                                                                              |                 |
| 6  |                                                                     |     |                                                                                                                                                                                                                                                                                                                                                                                                              |                 |
| 7  | <b>Methods: Assignment of interventions (for controlled trials)</b> |     |                                                                                                                                                                                                                                                                                                                                                                                                              |                 |
| 8  | Allocation:                                                         |     |                                                                                                                                                                                                                                                                                                                                                                                                              |                 |
| 9  |                                                                     |     |                                                                                                                                                                                                                                                                                                                                                                                                              |                 |
| 10 | Sequence generation                                                 | 16a | Method of generating the allocation sequence (eg, computer-generated random numbers), and list of any factors for stratification. To reduce predictability of a random sequence, details of any planned restriction (eg, blocking) should be provided in a separate document that is unavailable to those who enrol participants or assign interventions                                                     | _____7_____     |
| 11 |                                                                     |     |                                                                                                                                                                                                                                                                                                                                                                                                              |                 |
| 12 |                                                                     |     |                                                                                                                                                                                                                                                                                                                                                                                                              |                 |
| 13 |                                                                     |     |                                                                                                                                                                                                                                                                                                                                                                                                              |                 |
| 14 |                                                                     |     |                                                                                                                                                                                                                                                                                                                                                                                                              |                 |
| 15 |                                                                     |     |                                                                                                                                                                                                                                                                                                                                                                                                              |                 |
| 16 | Allocation concealment mechanism                                    | 16b | Mechanism of implementing the allocation sequence (eg, central telephone; sequentially numbered, opaque, sealed envelopes), describing any steps to conceal the sequence until interventions are assigned                                                                                                                                                                                                    | _____7_____     |
| 17 |                                                                     |     |                                                                                                                                                                                                                                                                                                                                                                                                              |                 |
| 18 |                                                                     |     |                                                                                                                                                                                                                                                                                                                                                                                                              |                 |
| 19 |                                                                     |     |                                                                                                                                                                                                                                                                                                                                                                                                              |                 |
| 20 | Implementation                                                      | 16c | Who will generate the allocation sequence, who will enrol participants, and who will assign participants to interventions                                                                                                                                                                                                                                                                                    | _____7_____     |
| 21 |                                                                     |     |                                                                                                                                                                                                                                                                                                                                                                                                              |                 |
| 22 |                                                                     |     |                                                                                                                                                                                                                                                                                                                                                                                                              |                 |
| 23 |                                                                     |     |                                                                                                                                                                                                                                                                                                                                                                                                              |                 |
| 24 | Blinding (masking)                                                  | 17a | Who will be blinded after assignment to interventions (eg, trial participants, care providers, outcome assessors, data analysts), and how                                                                                                                                                                                                                                                                    | _____12_____    |
| 25 |                                                                     |     |                                                                                                                                                                                                                                                                                                                                                                                                              |                 |
| 26 |                                                                     |     |                                                                                                                                                                                                                                                                                                                                                                                                              |                 |
| 27 |                                                                     | 17b | If blinded, circumstances under which unblinding is permissible, and procedure for revealing a participant's allocated intervention during the trial                                                                                                                                                                                                                                                         | _____N/A_____   |
| 28 |                                                                     |     |                                                                                                                                                                                                                                                                                                                                                                                                              |                 |
| 29 |                                                                     |     |                                                                                                                                                                                                                                                                                                                                                                                                              |                 |
| 30 |                                                                     |     |                                                                                                                                                                                                                                                                                                                                                                                                              |                 |
| 31 | <b>Methods: Data collection, management, and analysis</b>           |     |                                                                                                                                                                                                                                                                                                                                                                                                              |                 |
| 32 |                                                                     |     |                                                                                                                                                                                                                                                                                                                                                                                                              |                 |
| 33 | Data collection methods                                             | 18a | Plans for assessment and collection of outcome, baseline, and other trial data, including any related processes to promote data quality (eg, duplicate measurements, training of assessors) and a description of study instruments (eg, questionnaires, laboratory tests) along with their reliability and validity, if known. Reference to where data collection forms can be found, if not in the protocol | _____13-14_____ |
| 34 |                                                                     |     |                                                                                                                                                                                                                                                                                                                                                                                                              |                 |
| 35 |                                                                     |     |                                                                                                                                                                                                                                                                                                                                                                                                              |                 |
| 36 |                                                                     |     |                                                                                                                                                                                                                                                                                                                                                                                                              |                 |
| 37 |                                                                     |     |                                                                                                                                                                                                                                                                                                                                                                                                              |                 |
| 38 |                                                                     |     |                                                                                                                                                                                                                                                                                                                                                                                                              |                 |
| 39 |                                                                     | 18b | Plans to promote participant retention and complete follow-up, including list of any outcome data to be collected for participants who discontinue or deviate from intervention protocols                                                                                                                                                                                                                    | _____12_____    |
| 40 |                                                                     |     |                                                                                                                                                                                                                                                                                                                                                                                                              |                 |
| 41 |                                                                     |     |                                                                                                                                                                                                                                                                                                                                                                                                              |                 |
| 42 |                                                                     |     |                                                                                                                                                                                                                                                                                                                                                                                                              |                 |

|    |                                 |     |                                                                                                                                                                                                                                                                                                                                       |                   |
|----|---------------------------------|-----|---------------------------------------------------------------------------------------------------------------------------------------------------------------------------------------------------------------------------------------------------------------------------------------------------------------------------------------|-------------------|
| 1  | Data management                 | 19  | Plans for data entry, coding, security, and storage, including any related processes to promote data quality (eg, double data entry; range checks for data values). Reference to where details of data management procedures can be found, if not in the protocol                                                                     | _____ 14 _____    |
| 2  |                                 |     |                                                                                                                                                                                                                                                                                                                                       |                   |
| 3  |                                 |     |                                                                                                                                                                                                                                                                                                                                       |                   |
| 4  |                                 |     |                                                                                                                                                                                                                                                                                                                                       |                   |
| 5  | Statistical methods             | 20a | Statistical methods for analysing primary and secondary outcomes. Reference to where other details of the statistical analysis plan can be found, if not in the protocol                                                                                                                                                              | _____ 16 _____    |
| 6  |                                 |     |                                                                                                                                                                                                                                                                                                                                       |                   |
| 7  |                                 |     |                                                                                                                                                                                                                                                                                                                                       |                   |
| 8  |                                 | 20b | Methods for any additional analyses (eg, subgroup and adjusted analyses)                                                                                                                                                                                                                                                              | _____ 16-17 _____ |
| 9  |                                 |     |                                                                                                                                                                                                                                                                                                                                       |                   |
| 10 |                                 | 20c | Definition of analysis population relating to protocol non-adherence (eg, as randomised analysis), and any statistical methods to handle missing data (eg, multiple imputation)                                                                                                                                                       | _____ 16 _____    |
| 11 |                                 |     |                                                                                                                                                                                                                                                                                                                                       |                   |
| 12 |                                 |     |                                                                                                                                                                                                                                                                                                                                       |                   |
| 13 |                                 |     |                                                                                                                                                                                                                                                                                                                                       |                   |
| 14 | <b>Methods: Monitoring</b>      |     |                                                                                                                                                                                                                                                                                                                                       |                   |
| 15 |                                 |     |                                                                                                                                                                                                                                                                                                                                       |                   |
| 16 | Data monitoring                 | 21a | Composition of data monitoring committee (DMC); summary of its role and reporting structure; statement of whether it is independent from the sponsor and competing interests; and reference to where further details about its charter can be found, if not in the protocol. Alternatively, an explanation of why a DMC is not needed | _____ N/A _____   |
| 17 |                                 |     |                                                                                                                                                                                                                                                                                                                                       |                   |
| 18 |                                 |     |                                                                                                                                                                                                                                                                                                                                       |                   |
| 19 |                                 |     |                                                                                                                                                                                                                                                                                                                                       |                   |
| 20 |                                 |     |                                                                                                                                                                                                                                                                                                                                       |                   |
| 21 |                                 |     |                                                                                                                                                                                                                                                                                                                                       |                   |
| 22 |                                 | 21b | Description of any interim analyses and stopping guidelines, including who will have access to these interim results and make the final decision to terminate the trial                                                                                                                                                               | _____ N/A _____   |
| 23 |                                 |     |                                                                                                                                                                                                                                                                                                                                       |                   |
| 24 |                                 |     |                                                                                                                                                                                                                                                                                                                                       |                   |
| 25 | Harms                           | 22  | Plans for collecting, assessing, reporting, and managing solicited and spontaneously reported adverse events and other unintended effects of trial interventions or trial conduct                                                                                                                                                     | _____ 21 _____    |
| 26 |                                 |     |                                                                                                                                                                                                                                                                                                                                       |                   |
| 27 |                                 |     |                                                                                                                                                                                                                                                                                                                                       |                   |
| 28 | Auditing                        | 23  | Frequency and procedures for auditing trial conduct, if any, and whether the process will be independent from investigators and the sponsor                                                                                                                                                                                           | _____ 10 _____    |
| 29 |                                 |     |                                                                                                                                                                                                                                                                                                                                       |                   |
| 30 |                                 |     |                                                                                                                                                                                                                                                                                                                                       |                   |
| 31 |                                 |     |                                                                                                                                                                                                                                                                                                                                       |                   |
| 32 | <b>Ethics and dissemination</b> |     |                                                                                                                                                                                                                                                                                                                                       |                   |
| 33 |                                 |     |                                                                                                                                                                                                                                                                                                                                       |                   |
| 34 | Research ethics approval        | 24  | Plans for seeking research ethics committee/institutional review board (REC/IRB) approval                                                                                                                                                                                                                                             | _____ 18 _____    |
| 35 |                                 |     |                                                                                                                                                                                                                                                                                                                                       |                   |
| 36 |                                 |     |                                                                                                                                                                                                                                                                                                                                       |                   |
| 37 | Protocol amendments             | 25  | Plans for communicating important protocol modifications (eg, changes to eligibility criteria, outcomes, analyses) to relevant parties (eg, investigators, REC/IRBs, trial participants, trial registries, journals, regulators)                                                                                                      | _____ 19 _____    |
| 38 |                                 |     |                                                                                                                                                                                                                                                                                                                                       |                   |
| 39 |                                 |     |                                                                                                                                                                                                                                                                                                                                       |                   |
| 40 |                                 |     |                                                                                                                                                                                                                                                                                                                                       |                   |
| 41 |                                 |     |                                                                                                                                                                                                                                                                                                                                       |                   |
| 42 |                                 |     |                                                                                                                                                                                                                                                                                                                                       |                   |

|    |                               |     |                                                                                                                                                                                                                                                                                     |               |
|----|-------------------------------|-----|-------------------------------------------------------------------------------------------------------------------------------------------------------------------------------------------------------------------------------------------------------------------------------------|---------------|
| 1  | Consent or assent             | 26a | Who will obtain informed consent or assent from potential trial participants or authorised surrogates, and how (see Item 32)                                                                                                                                                        | ___ 6, 21 ___ |
| 2  |                               |     |                                                                                                                                                                                                                                                                                     |               |
| 3  |                               |     |                                                                                                                                                                                                                                                                                     |               |
| 4  |                               | 26b | Additional consent provisions for collection and use of participant data and biological specimens in ancillary studies, if applicable                                                                                                                                               | ___ N/A ___   |
| 5  |                               |     |                                                                                                                                                                                                                                                                                     |               |
| 6  |                               |     |                                                                                                                                                                                                                                                                                     |               |
| 7  | Confidentiality               | 27  | How personal information about potential and enrolled participants will be collected, shared, and maintained in order to protect confidentiality before, during, and after the trial                                                                                                | ___ 22 ___    |
| 8  |                               |     |                                                                                                                                                                                                                                                                                     |               |
| 9  |                               |     |                                                                                                                                                                                                                                                                                     |               |
| 10 | Declaration of interests      | 28  | Financial and other competing interests for principal investigators for the overall trial and each study site                                                                                                                                                                       | ___ 22 ___    |
| 11 |                               |     |                                                                                                                                                                                                                                                                                     |               |
| 12 |                               |     |                                                                                                                                                                                                                                                                                     |               |
| 13 | Access to data                | 29  | Statement of who will have access to the final trial dataset, and disclosure of contractual agreements that limit such access for investigators                                                                                                                                     | ___ 22 ___    |
| 14 |                               |     |                                                                                                                                                                                                                                                                                     |               |
| 15 |                               |     |                                                                                                                                                                                                                                                                                     |               |
| 16 | Ancillary and post-trial care | 30  | Provisions, if any, for ancillary and post-trial care, and for compensation to those who suffer harm from trial participation                                                                                                                                                       | ___ 21 ___    |
| 17 |                               |     |                                                                                                                                                                                                                                                                                     |               |
| 18 |                               |     |                                                                                                                                                                                                                                                                                     |               |
| 19 |                               |     |                                                                                                                                                                                                                                                                                     |               |
| 20 | Dissemination policy          | 31a | Plans for investigators and sponsor to communicate trial results to participants, healthcare professionals, the public, and other relevant groups (eg, via publication, reporting in results databases, or other data sharing arrangements), including any publication restrictions | ___ 22 ___    |
| 21 |                               |     |                                                                                                                                                                                                                                                                                     |               |
| 22 |                               |     |                                                                                                                                                                                                                                                                                     |               |
| 23 |                               |     |                                                                                                                                                                                                                                                                                     |               |
| 24 |                               | 31b | Authorship eligibility guidelines and any intended use of professional writers                                                                                                                                                                                                      | ___ N/A ___   |
| 25 |                               |     |                                                                                                                                                                                                                                                                                     |               |
| 26 |                               | 31c | Plans, if any, for granting public access to the full protocol, participant-level dataset, and statistical code                                                                                                                                                                     | ___ 22 ___    |
| 27 |                               |     |                                                                                                                                                                                                                                                                                     |               |
| 28 |                               |     |                                                                                                                                                                                                                                                                                     |               |
| 29 | <b>Appendices</b>             |     |                                                                                                                                                                                                                                                                                     |               |
| 30 |                               |     |                                                                                                                                                                                                                                                                                     |               |
| 31 | Informed consent materials    | 32  | Model consent form and other related documentation given to participants and authorised surrogates                                                                                                                                                                                  | ___ N/A ___   |
| 32 |                               |     |                                                                                                                                                                                                                                                                                     |               |
| 33 |                               |     |                                                                                                                                                                                                                                                                                     |               |
| 34 | Biological specimens          | 33  | Plans for collection, laboratory evaluation, and storage of biological specimens for genetic or molecular analysis in the current trial and for future use in ancillary studies, if applicable                                                                                      | ___ N/A ___   |
| 35 |                               |     |                                                                                                                                                                                                                                                                                     |               |
| 36 |                               |     |                                                                                                                                                                                                                                                                                     |               |

\*It is strongly recommended that this checklist be read in conjunction with the SPIRIT 2013 Explanation & Elaboration for important clarification on the items. Amendments to the protocol should be tracked and dated. The SPIRIT checklist is copyrighted by the SPIRIT Group under the Creative Commons "[Attribution-NonCommercial-NoDerivs 3.0 Unported](https://creativecommons.org/licenses/by-nc-nd/3.0/)" license.
